1 **Direct energy transfer from photosystem II to photosystem I is the major regulator of**  
2 **winter sustainability of Scots pine**

3

4 **Authors**

5 Pushan Bag<sup>1¶</sup>, Volha Chukhutsina<sup>2¶#</sup>, Zishan Zhang<sup>1&</sup>, Suman Paul<sup>1#</sup>, Alexander G. Ivanov<sup>3,4</sup>,  
6 Tatyana Shutova<sup>1</sup>, Roberta Croce<sup>2</sup>, Alfred R. Holzwarth<sup>2\*</sup>, Stefan Jansson<sup>1\*\*</sup>

7

8

9 **Affiliations**

10 <sup>1</sup>Umeå Plant Science Centre, Department of Plant Physiology, Umeå University, Umeå,  
11 Sweden.

12 <sup>2</sup>Department of Physics and Astronomy, Faculty of Sciences, Vrije Universiteit Amsterdam,  
13 Amsterdam, The Netherlands

14 <sup>3</sup>Department of Biology, University of Western Ontario, London, Ontario, Canada.

15 <sup>4</sup>Institute of Biophysics and Biomedical Engineering, Bulgarian Academy of Sciences, Sofia,  
16 Bulgaria.

17

18 <sup>¶</sup> P.B and V.C. contributed equally to this work

19 <sup>≠</sup> New address: Department of Life Sciences, Imperial College London, United Kingdom

20 <sup>#</sup> New address: Department of Biochemistry and Biophysics, Stockholm University, Sweden

21 <sup>&</sup> New address: State Key Laboratory of Crop Biology, College of Life Sciences, Shandong  
22 Agricultural University, China

23

24 **\*\* Lead corresponding author:** stefan.jansson@umu.se

25 **\* Second corresponding author:** a.holzwarth@vu.nl

26 **Abstract**

27 Evergreen conifers in boreal forests can survive extremely cold (freezing) temperatures during  
28 the long dark winter and fully recover during the summer. A phenomenon called ‘sustained  
29 quenching’ putatively provides photoprotection and enables their survival, but its precise  
30 molecular and physiological mechanisms are not understood. To unveil them, we have  
31 analyzed the seasonal adaptation of the photosynthetic machinery of Scots pine (*Pinus*  
32 *sylvestris*) trees by monitoring multi-year changes in weather, chlorophyll fluorescence,  
33 chloroplast ultrastructure, and changes in pigment-protein composition. Recorded Photosystem  
34 II and Photosystem I performance parameters indicate that highly dynamic structural and  
35 functional seasonal rearrangements of the photosynthetic apparatus occur. Although several  
36 mechanisms might contribute to ‘sustained quenching’ of winter/early spring pine needles,  
37 time-resolved fluorescence analysis shows that extreme down-regulation of photosystem II  
38 activity along with direct energy transfer from photosystem II to photosystem I plays a major  
39 role. This mechanism is enabled by extensive thylakoid destacking allowing for mixing of PSII  
40 with PSI complexes. These two linked phenomena play crucial roles in winter acclimation and  
41 protection.

42

43

44

45

46

47

48

49

50

51 **Graphical abstract**

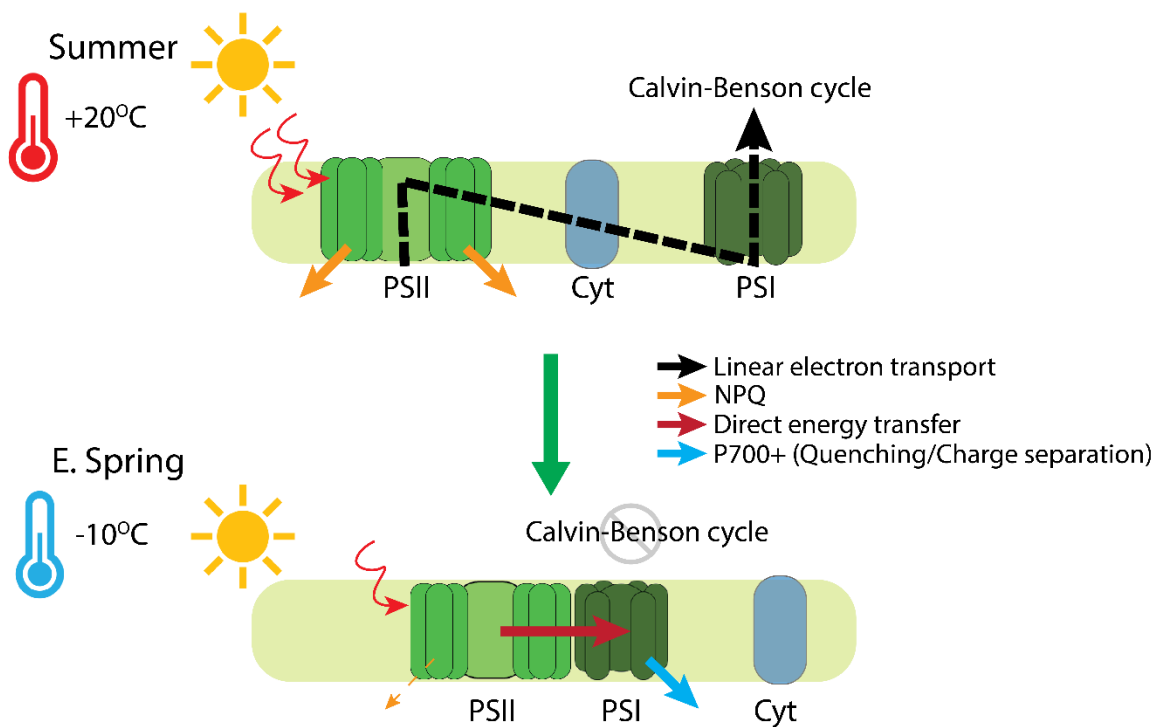

52

53

54 **Keywords:** Conifer, Seasonal adaptation, Photosystem II, Photosystem I, Quenching,

55 Thylakoid ultrastructure, Non-photochemical quenching, Sustained quenching.

56

57

58

59

60

61

62

63

64

65

66

## 67 **Introduction**

68

69         Photosynthesis is the basis for most life on earth, and the ability to sustain growth by  
70 harvesting sunlight confers such an enormous evolutionary advantage that photosynthetic  
71 organisms have developed numerous adaptations that enable them to photosynthesize in  
72 diverse environments. These include vast boreal forests, which cover ~70% of all coniferous  
73 forest of the world (mainly in the northern hemisphere)<sup>1</sup>, which have lower species diversity  
74 than many other terrestrial ecosystems and are often dominated by evergreen conifers, like pine  
75 and spruce<sup>2</sup>. Broadleaf deciduous trees and shrubs are also present, and sometimes deciduous  
76 conifers such as Larch (*Larix*) species, but there is no doubt that evergreen conifers are  
77 particularly well adapted to harsh boreal conditions, including short growing seasons and cold,  
78 snowy winters. Thus, evergreen conifers' adaptations to boreal regions must presumably  
79 include regulatory processes that protect the photosynthetic apparatus in their needles during  
80 the harsh winter and early spring. Knowledge of photoprotective mechanisms in various kinds  
81 of photosynthetic organisms has increased considerably in recent decades. Several control  
82 systems have been identified that allow the photosynthesis machinery to harmlessly dissipate  
83 excess excitation energy<sup>3-7</sup>. In 2003, Öquist and Huner<sup>8</sup> published a seminal review of  
84 photosynthesis in evergreen plants, which pointed out that overwintering conifer needles enter  
85 a state of 'sustained quenching' during winter. They found strong evidence for major  
86 alterations in the organization and composition of the photosystem II (PS II) antenna but also  
87 concluded that photosystem I (PS I) may play an important role, via nonphotochemical  
88 quenching of absorbed light or via quenching absorbed light photochemically through cyclic  
89 electron transport. Recently it was also shown that alternative electron transport might add up  
90 to this as well<sup>9</sup>. Up to date there exists no clear mechanism rationalizing winter quenching in  
91 conifers, although there are several proposed hypotheses<sup>8,10</sup>. Several protection mechanisms

92 may also occur in parallel, and (if so) they are likely activated largely well before the extreme  
93 stress occurs<sup>11,12</sup>. But the major conundrum arises in early spring, when temperatures are  
94 typically still low, so plants' biochemical and metabolic activities are strongly limited, but solar  
95 radiation is already high<sup>8</sup>. Once induced, the mechanisms need to be sustained, i.e. locked-in  
96 over the long winter season and protect the photosynthetic machinery. When conditions  
97 improve late in the spring, photosynthetic apparatus is restored and attains its active growth  
98 state in summer.

99 In previous explorations of these phenomena, a marked drop in steady-state  
100 fluorescence (measured as  $F_v/F_m$ ) has been recorded in several overwintering conifers, and  
101 some indications of the quenching mechanisms involved have been obtained. These reportedly  
102 include destacking of thylakoid membranes and associated changes in chloroplast  
103 ultrastructure<sup>13</sup>, in accordance with the drop in PSII maximal fluorescence<sup>8</sup>. In higher plants,  
104 thylakoid stacking and heterogeneity play crucial roles in the localizations of PSII and PSI in  
105 grana (tightly appressed thylakoid layers) and stroma lamellae, respectively. In conifers,  
106 although an extreme drop in maximal fluorescence in winter/early spring has been observed,  
107 its mechanistic relationship to thylakoid structural changes has not been explained. In the study  
108 reported here, we monitored steady-state chlorophyll fluorescence, ultrafast time-resolved  
109 fluorescence, and chloroplast ultrastructure in Scots pine needles from autumn to summer in  
110 three successive years. Our data strongly indicate that chlorophyll fluorescence quenching and  
111 thylakoid destacking, are strongly linked, mutually dependent, and crucial for the survival of  
112 evergreen conifers in the extreme northern boreal winter and early spring, when temperatures  
113 are low but solar radiation levels may be high.

114

115

116

117 **Results:**

118

119 *Seasonal changes in Photosystem II- and Photosystem I-related functional activities*

120 To monitor photosynthetic performance, we recorded several PSII and PSI parameters during  
121 three consecutive growth seasons (2015-2016, 2016-2017, and 2017-2018) along with  
122 concomitant changes in daily air temperature and solar radiation (Fig. 1A-I, II, III). For  
123 simplicity, in the main figures we only present (here onwards) data from 2017-2018, which we  
124 divided into five distinct seasons, based on weather parameters: Summer (S, June-Aug),  
125 autumn (A, Sept-mid Nov), winter (W, mid Nov- mid Feb), early spring (ES, mid Feb-mid  
126 Apr), and late spring (LS, mid Apr-June). Data from the other two growth seasons are provided  
127 in Supplementary information 1, 2 and 3.

128 We found characteristic seasonal patterns in maximum PSII fluorescence (Fm) and maximum  
129 quantum efficiency of PSII (expressed as Fv/Fm), in accordance with earlier reports<sup>8,10</sup>. Fv/Fm  
130 was highest in S, fell with reductions in ambient temperatures during A and W (Fig. 1B-I, II),  
131 and was lowest in ES (63% lower than in S), when low temperatures coincided with rises in  
132 solar irradiance (Fig. 1A-I-III; see also SI 2A). During LS, Fv/Fm gradually increased with  
133 increasing temperatures and peaked in S. The seasonal changes recorded in Fv/Fm were found  
134 to be mostly affected by changes in Fm rather than Fo (basic intrinsic fluorescence) (Fig. 1B-  
135 I). For deeper understanding of PSII performance, the fraction of absorbed light energy utilized  
136 by PSII photochemistry<sup>14</sup> ( $\Phi_{PSII}$ ) was measured (Fig. 1B-III). During W  $\Phi_{PSII}$  decreased  
137 significantly and reached minimal values (19% of S values) in ES (SI 2B).

138 Furthermore we tried to quantify the amount of absorbed light energy thermally  
139 dissipated by non-photochemical quenching (NPQ)<sup>3</sup>. The component of NPQ that play a crucial  
140 role under fluctuating light conditions is the fast component ( $\Delta pH$ -PsbS dependent- $qE^3$  or  
141 zeaxanthin dependent- $qZ^4$ ), which increased with increasing light intensities in all the seasons.

142 In S and A, the fast component did not reach a stationary phase even at  $1500 \mu\text{mol m}^{-2} \text{sec}^{-1}$   
143 illumination, while in W and LS samples a stationary phase was reached at  $500 \mu\text{mol m}^{-2} \text{sec}^{-1}$   
144 and in ES already at  $300 \mu\text{mol m}^{-2} \text{sec}^{-1}$  (Fig. 1C-I). Most importantly, in ES inducible  
145 steady-state NPQ was much smaller and overall slower due to the smaller amplitude of the fast  
146 component (~50% less than in S) in ES (Fig. 1C-II). This is due to the fact that ES needles have  
147 already developed static NPQ. Instead the quantum yield of non-regulated and/or constitutive  
148 loss ( $\Phi_{\text{NO}}$ ) of energy was high during ES (Fig. 1C-III) (SI 2D). This strongly suggests that  
149 this static NPQ is the fraction of absorbed light energy neither going to drive photochemistry  
150 ( $\Phi_{\text{PSII}}$ ) nor thermally dissipated by rapid regulated NPQ processes ( $qE/qZ$ ).

151 To confirm that this static quenching is a manifestation of a ‘sustained mode of  
152 quenching’ we artificially relaxed the ES needles (hereafter, ESR) for 48h in low light ( $80$   
153  $\mu\text{mol m}^{-2} \text{sec}^{-1}$ ) with 18/6 h photoperiod. During this recovery we observed no significant  
154 changes in  $F_v/F_m$  for 6-8 hours (less than a 10% increase), a modest increase (30%) after 24 h  
155 (Fig. 1D-I) and almost complete (95%) recovery to S levels after 48 h.  $F_o$  did not change  
156 significantly throughout the recovery period (Fig. 1D-I), but changes in  $F_m$  followed the same  
157 recovery dynamics as  $F_v/F_m$  (Fig. 1D-I), although maximal fluorescence ( $F_m$ ) was much  
158 higher in S than in 48 h ESR samples.  $\Phi_{\text{PSII}}$  did not change significantly until 12 h of recovery  
159 but recovered to 50% and 90% of S levels after 24 and 48 h, respectively (Fig. 1D-II).  $qE/qZ$ -  
160 dependent fast NPQ kinetics followed similar patterns to  $\Phi_{\text{PSII}}$  (Fig. 1D-III). It should be noted  
161 that light-dependent induction of the fast component of NPQ ( $qE/qZ$ ) was slower in the ESR  
162 samples than in S samples, even after 48 h of recovery, which appears to be mainly due to  
163 photoinhibition.

164 Seasonal changes in partitioning of absorbed light energy within PSI showed that  
165  $Y(I)$  was highest in S, declined in A and W, and reached minimal values in ES (Fig. 2A-I).  
166 Although it decreased,  $Y(I)$  was much less affected than the PSII activity ( $\Phi_{\text{PSII}}$ ) during the

167 cold periods (Fig. 1B-III) (SI 3A). Y(NA) followed the same seasonal pattern, with minimum  
168 values registered in ES and a steady recovery until S (Fig. 2A-II) (SI 3B). In contrast to  
169 Y(NA), Y(ND) considerably increased during the cold periods and peaked (at 69% higher than  
170 S values) in ES, then gradually declined to minimum values in S (Fig. 2A-III, SI 3C). This  
171 suggests that during early spring most of the absorbed light energy is dissipated by oxidized  
172 P700 (P700+) to prevent photoinhibition caused by over reduction of the acceptor side as iron  
173 sulfur clusters get damaged<sup>15</sup>. During the first 3 h of the recovery period,  $\Phi$ PSI did not  
174 significantly change, but it gradually returned to S levels over 48 h (Fig. 2B-I). Y(NA) did not  
175 change much during recovery (Fig. 1E-II). Y(ND) increased slightly during the first 3 h, but  
176 then gradually decreased, and ESR samples did not quite reach S values. Based on these results,  
177 we conclude that the restoration of PSI light use efficiency takes longer than 48 hours.

178

### 179 *Sustained non-photochemical quenching dominates in early spring needles*

180 To elucidate the mechanism of “sustained quenching” observed in pine during the early spring  
181 periods, ultrafast time-resolved fluorescence measurements on intact pine needles were  
182 performed at a temperature of -20°C using the setup and approach described previously<sup>16,17</sup>. In  
183 addition, a special chamber was designed to keep the rotational cuvette with the sample at -20  
184 C (SI 4.1). Fluorescence decay traces of S needles in the original state (dark-adapted, Fig. 3A,  
185 Summer dark) were compared to the needles collected in ES when sustained quenching was  
186 present (Fig. 3A, Early spring) and after the quenching in the needles had been relaxed at room  
187 temperature (ESR) (Fig. 3A, E. spring recovered). To understand whether sustained quenching  
188 observed in ES occurs via a similar quenching mechanism to light-induced quenching, S  
189 needles exposed to HL for 30 min (SQ) were also measured (Fig. 3A, Summer quenched). As  
190 shown by the direct comparison of the decay curves (Fig. 3A), the fluorescence in SQ needles  
191 is much shorter-lived as compared to that of S needles. However, the fluorescence decays of



192 ES needles are still pronouncedly shorter-lived than that of the SQ samples, thus characterizing  
193 the “sustained quenching” in the ES samples as the most pronounced quenching at all detection  
194 wavelengths and under all conditions. In contrast, ESR and S samples showed very similar  
195 fluorescence decays, indicating that the ES sample recovered quite (although not completely,  
196 *vide infra*) well from sustained quenching within 48 h of recovery treatment.

197

### 198 *Global analysis of the of the fluorescence kinetics of pine needles*

199 To get the first hints on the mechanism(s) underlying sustained quenching in early spring global  
200 analysis<sup>18</sup> was performed on all datasets: ES, S, SQ (Fig. 3 B) and ESR (SI 4.2) needles. Six  
201 Decay Associated Spectra (DAS) were required to fit the fluorescence kinetics in all four cases.  
202 Three DAS were tentatively assigned to PSI: 11-16 ps, 50-60 ps, 150-180 ps (Fig 3B, SI 4.1).  
203 Their spectra and lifetimes are reminiscent of previously reported PSI-related DAS in other  
204 plant species *in vivo*<sup>16,17,19</sup>. The fastest component represents energy equilibration between  
205 Chl<sub>red</sub> and Chl<sub>blue</sub><sup>20,21</sup>. The second DAS in S needles peaks around 685-690 nm with a broad  
206 emission in the 700-720 nm region. Therefore, it mainly represents PSI core decay in  
207 combination with the 710-720 Chls of Lhcas. The third DAS (185 ps) peaks at 680 nm with  
208 some contribution at 730 nm, and therefore, it should be primarily assigned to LHCII and some  
209 Chl<sub>red</sub> in PSI. In quenched states (SQ and ES, in particular) these two DAS have substantially  
210 higher contribution around 680 nm and, as a result, the reconstructed steady-state PSI spectra  
211 have higher emission around 680-685 nm as compared to the unquenched states (S and ESR  
212 see SI 4.2). It indicates that upon quenching PSII and/or LHCII kinetics also contribute to these  
213 PSI-related components. In S and ESR states, the remaining three DAS peak at 682 nm and  
214 therefore, are assigned to PSII (Fig 3B and SI 4.1). Their lifetimes are 0.5-0.6 ns, 1.5-2.0 ns  
215 and 4 ns, similar to what was resolved previously for PSII in the closed state<sup>16,17</sup>. However, in  
216 ES two considerably shorter-lived PSII-related DAS were observed with lifetimes of 0.3 ns

217 and 0.8 ns. This demonstrates that PSII kinetics is indeed quenched strongly in ES needles.  
218 Additionally, we resolved a DAS with 8 ps lifetime in the ES sample representing excitation  
219 energy transfer (EET) from Chl a pools emitting at ~680 nm to those emitting at 700-730 nm,  
220 respectively. This indicates that there occurs efficient EET between PSII and/or LHCII and PSI  
221 in the ES needles.

222 In a nutshell, global analysis results show that sustained quenching in ES state involves both  
223 PSII/LHCII and PSI through a direct energy transfer. This mechanism provides much stronger  
224 quenching than the high-light-induced quenching in the summer needles (SQ).

225

### 226 *Target modeling of the fluorescence kinetics of unquenched pine needles*

227 To resolve the mechanism(s) responsible for the ‘sustained quenching’ in pine needles in detail  
228 we performed target analysis<sup>22</sup> of all the kinetic data. By testing kinetic models that had been  
229 validated previously on isolated subcomplexes<sup>23-25</sup> it was possible to separate the PSI from the  
230 PSII kinetics. In S needles (Fig 4C, Summer dark) the PSI kinetics was described with two  
231 emitting compartments (PSI red, Ant/core) and one non-emitting radical pair (RP, Fig 3C). The  
232 resolved rates and Species Associated Spectra (SAS) are strongly reminiscent of the ones  
233 reported for the PSI-LHCI complex<sup>25</sup>. Kinetics from the PSII antenna/RC complex was  
234 described by one emitting compartment (Ant/core) and two non-emitting radical pairs (RP1  
235 and RP2, Fig 3C) as reported previously<sup>16,23,24,26</sup>. According to their SAS and rates, the emitting  
236 species represents the equilibrated excited state of the PSII-LHCII super-complex. In our  
237 analysis, to achieve a very good fit, two pools of PSII complexes with different decay rates  
238 were required (pool 1, pool 2, Fig 3C, see the detailed comparison of the residuals plots in SI  
239 4.3) for the S sample. The two pools differ in the rate constants of charge separation in a manner  
240 that is typical for PSII particles with different antenna sizes (see <sup>18,19</sup> for discussion and  
241 explanation), which result in different average lifetimes (Table 3 SM). In the S sample, PSI

242 with its antenna accounts for 30% of the total absorption cross-section at the excitation  
243 wavelength (662 nm), while the two PSII pools account for 40% and 30% of the total  
244 absorption cross-section. No internal quenching related to any NPQ process of these PSII  
245 compartments was observed.

246 The target model for the ESR needles is rather similar to that of S needles (SI 4.2). The main  
247 difference is that the smaller PSII pool (with a very small absorption cross-section of ca. 10%)  
248 shows an unusually small charge separation rate. The most likely explanation of this  
249 phenomenon is that a small percentage of PSII RCs has been photo inhibited during the 48 h  
250 relaxation process from the sustained quenching state, which agrees with NPQ measurements.

251

252 ***Direct energetic transfer between PSII and PSI is the dominating component of “sustained***  
253 ***quenching”***

254 As for the S samples, also the description of the ES sample (Fig. 3C) required a three -  
255 compartmental target model for PSI and the presence of two PSII pools, each described by a  
256 three-compartmental model. The two PSII pools differ in the rate constants of charge separation  
257 in a similar manner as in S samples. The kinetics are also very similar to that of the S samples,  
258 however with a slightly increased charge separation rate. This can be interpreted as a  
259 consequence of partial reduction in the physical antenna size. This goes in line with an increase  
260 in the Chl a/b ratio in ES as compared to S samples (SI 6 Table 2).

261 The striking feature is the presence of a very strong contribution of a direct energy transfer  
262 from PSII to PSI. Without allowing for this direct energy transfer, the data could not at all be  
263 fitted adequately (SI 4.3, 4.4). This process has a transfer rate of  $4.4 \text{ ns}^{-1}$ . A small compartment  
264 representing quenched and functionally detached LHCII was also needed for a satisfactory  
265 description of the ES samples (See more details on this component in the next section). Overall,

266 the target analysis shows that direct energy transfer from PSII to PSI complexes provides the  
267 dominant quenching mechanism of PSII complexes in ES needles causing the pronounced  
268 “sustained quenching”.

269

### 270 *Comparison of sustained quenching and light-induced quenching*

271 To model the fluorescence kinetics of SQ needles (Fig 4C) again three-compartmental models  
272 for PSI and PSII were required. However, unlike in previous cases, one single PSII pool was  
273 sufficient to describe the PSII kinetics.

274 Besides PSII and PSI, one additional component was needed to satisfactorily describe the  
275 fluorescence kinetics in the SQ samples. The rates, spectra and average lifetime (0.4 ns, Table  
276 3 SI) of these compartments are strongly reminiscent of what was reported previously for  
277 highly quenched LHCII aggregates<sup>27</sup>, and the quenched LHCII complexes under NPQ  
278 conditions in wild type *Arabidopsis*<sup>16</sup> and in *Arabidopsis* mutants depleted of the reaction  
279 centers<sup>28</sup>. We therefore assign this highly quenched component to the quenched LHCII antenna  
280 energetically disconnected from both PSII and PSI. However, the addition of this quenched  
281 LHCII compartment was not sufficient to fully describe the fluorescence kinetics (SI 4.4). The  
282 species-associated spectra (SAS) and kinetics of PSII still contained a substantial amount of  
283 690-700 and 730 nm emission, entirely uncharacteristic for PSII super-complexes, but  
284 characteristic of PSI complexes<sup>21,25</sup>. Interestingly, also the SAS of the PSI antenna/core  
285 complex contains a 680 nm emission, which is characteristic for PSII. This strongly suggests  
286 – as can be directly deduced from the spectral properties - the presence of a direct energetic  
287 contact between PSI and PSII (Fig 3C). Introducing such a connection in the target model  
288 indeed resulted in a considerably better fit ( $\chi^2$  decreased from 1.198 to 1.093, see SI 4.3). Also,  
289 the PSII and PSI kinetics became well-separated in such a model. The resolved direct energy  
290 transfer rate from PSII to PSI is quite high ( $2.3 \text{ ns}^{-1}$ ), implying that a part of energy absorbed

291 by PSII is actually funneled to PSI. However, this rate of direct energy transfer in SQ needles  
292 is only about half of that in ES needles, suggesting, that unlike in cold-induced sustained  
293 quenching, upon light illumination, spillover is not the major process. Contribution of the  
294 quenched antenna, on the other hand plays the major role.

295

### 296 *Efficiency of direct energy transfer quenching in different conditions*

297 By evaluating the kinetic information provided in Fig. 3C one can get a quantitative estimation  
298 of the degrees of light use efficiencies (for photosynthesis) on the one hand, and for  
299 photoprotection/quenching on the other hand, present in both PSII and PSI in the different  
300 situations (c.f. SI 4.5, SI Table 4). In S needles 70% of the total absorbed energy drives PSII  
301 charge separation and only 30% PSI charge separation. In the SQ needles the percentage of  
302 energy flowing into the PSII reaction center drops to 7.1%, while it increases to 67% for PSI.  
303 Upon strong light illumination most of PSII reaction centers will be closed, and a fraction of  
304 that total energy flowing through the RC can produce harmful reactive species like ROS<sup>29,30</sup>.  
305 Since the percentage of energy flow into PSII decreases 10 times (70% in S and 7.1% in SQ)  
306 in SQ as compared to S, this means that the potential of oxidative damage is reduced by a factor  
307 of 10 by the quenching process. This factor is increased by a further factor of approx. 2 due to  
308 the large pool of functionally detached and quenched LHCI. So, in SQ needles the overall  
309 quenching provides a protection factor of 20 for PSII compared to S needles. In the sustained  
310 quenched ES samples this effect is much more extreme: Only 1.5% of the total absorbed energy  
311 in the system flows through the PSII reaction center potentially causing oxidative damage  
312 (assuming all other factors are equal). Thus, in total, ‘sustained quenching’ in ES samples  
313 provides a protection factor of approx. 40 to PSII (double of SQ) compared to S needles. This  
314 huge protection factor explains well why “sustained quenching” is so effective enabling pine  
315 needles to survive the harsh winter and early spring conditions.

### 316 ***Massive destacking of grana membranes in the winter***

317 In accordance with early reports<sup>31,32</sup>, we observed strong seasonal changes in chloroplast  
318 ultrastructure, including loss of grana stacks during early spring (Fig. 4A-III). Ultrastructural  
319 changes derived from morphometric analysis of electron micrographs (Fig. 4A) indicate that  
320 average numbers of grana per chloroplast steadily decreased from autumn to winter and  
321 reached minimal values in early spring, corresponding to just 68% of S values (SI 6 table 1).  
322 More strikingly, the number of appressed thylakoid layers/granum dramatically declined from  
323 A (4.97) to ES (2.72) and rose back in S (6.50) (Table 1). These changes corroborate the shift  
324 in grana stacking illustrated in Fig 4B. In S and A, 3-6 layered grana stacks accounted for 60-  
325 70% of total stacks. In contrast in ES samples, 70-75% and 15-20% of the grana had only two  
326 and three layers, respectively (Fig. 4B-II). These changes in ES samples were accompanied by  
327 a transient doubling of the number of lipid globules (plastoglobuli) per cell (SI 6, table 1) when  
328 the chloroplast structure deviated most strongly from the S state.

329 To obtain deeper understanding of the thylakoid plasticity in ES needles we also subjected  
330 needles collected at specific early spring and summer dates to EM analysis after artificially  
331 induced recovery under different light conditions (Fig. 5A-I to IV). When both S and ESR  
332 samples were exposed to HL for 30 (SQ1 for S samples, ESRQ1 for ESR samples) and 60 mins  
333 (SQ2 for S samples, ESRQ2 for ESR samples) similar destacking of grana (as of ES samples)  
334 have been observed (Fig 5B). These changes in grana structures recorded in ESR and S samples  
335 (Fig 5B-II) following short term HL exposure strongly corroborate the high dynamic plasticity  
336 of the thylakoid membrane, which appears to be essential for acclimation to the harsh boreal  
337 winters.

### 338 ***Changes in pigment and protein composition of ES, ER, SQ and S samples***

339 We also analyzed pigments of the pine needles used for spectroscopic measurements and found  
340 substantial differences in pigment contents between S and ES needles (SI 6 table 2). In S and

341 ES samples the Chl a/b ratios were 2.8 and 3.4, respectively, indicating that S needles had  
342 higher relative amounts of Lhcbs and other Chl b-binding proteins. The Chl /carotenoid ratio  
343 was also substantially lower in ES samples than in S samples, indicating that they had higher  
344 amounts of carotenoids (mainly lutein and violaxanthin/zeaxanthin). We observed no  
345 significant difference in total Chl pigment contents between S and SQ samples.

346 For quantifying the core and antenna proteins, isolated thylakoids were subjected to SDS-  
347 PAGE and were immunoblotted against specific antibodies (SI 5). This revealed that ES  
348 samples contain a lower abundance of core (PsaD, PsbD) and antenna (Lhcb2, Lhca4) proteins  
349 than in S, in line with earlier reports<sup>33</sup> (SI 5). ESR samples contained lower amounts of PsbD  
350 and Lhcb2 compared to S, which might reflect on the minor amount of photoinhibition seen in  
351 fluorescence data.

352

### 353 **Discussion**

354 Distinct changes in chloroplast ultrastructure, including loss of grana thylakoids and  
355 disorganization resulting in mostly single-/bi-stromal thylakoid membranes during the cold  
356 winter season, followed by recovery during the late spring/summer season have been observed  
357 in various conifers<sup>8,13,32</sup>. We observed similar strong seasonal variations in the chloroplast  
358 architecture of pine chloroplasts (Fig. 4, SI 6 table 1) and together with the fluorescence data  
359 presented above we are able to decipher the major molecular mechanism that connects these  
360 changes to the pronounced ‘sustained quenching’ described in conifers in the winter.

361 The seasonal reductions in maximal quantum efficiency of PSII (Fig. 1B-II) and light  
362 energy utilization during the winter (Fig. 1B-III) were associated with a substantial increase in  
363 excitation pressure, indicating overall reduction of the photosynthetic electron transport  
364 chain<sup>34</sup>. In early spring, conifers harvest light energy but use of the excitation energy for

365 photosynthesis is severely restricted, resulting in potential photoinhibition. Hence, all  
366 overwintering conifers must develop highly efficient mechanisms for photoprotection of the  
367 photosynthetic apparatus. The major photoprotective mechanism for de-excitation of excess  
368 light energy in green plants and algae is the rapidly/ reversible  $\Delta\text{pH}$ - dependent non-  
369 photochemical quenching (qE) that occurs in the pigment bed of LHCII proteins<sup>3,16,35</sup>.  
370 However, several alternative and/or supplementary photoprotective mechanisms for effective  
371 thermal deactivation of excess light energy have also been proposed<sup>5,12,13,36–38</sup>.

372 At first glance, the sharp decline in  $\Phi\text{PSII}$  during early spring (Fig. 1B-III), might  
373 suggest that excess irradiance is dissipated via qE, which has been established as one of the  
374 most effective mechanisms for coping with the excess energy flux<sup>3</sup>. However, fast inducible  
375 qE was extremely low (Fig 1C-II,III) in ES samples and was not restored to S levels even after  
376 48 h of recovery treatment. (Fig 1D-III). This is not unexpected, since, in contrast to the fast  
377 energy dissipation (qE) depending on  $\Delta\text{pH}$  and PsbS-protein<sup>3</sup> the energy dissipation during  
378 winter (sustained quenching) occurs under strong down-regulation, even perhaps in the absence  
379 of  $\Delta\text{pH}$ <sup>8,10,39</sup>. However, we can assign this relatively small qE contribution to quenching to the  
380 small component (accounting for 4.7% of the absorption cross-section) of detached and  
381 quenched LHCII. This fraction was much smaller than in light-quenched samples (18%), and  
382 absent in both the dark-adapted S samples and recovered ES samples. Incidentally, a so-called  
383 ‘cold hard band’ has been reported in low temperature fluorescence spectra and kinetics of  
384 cold-acclimated evergreens<sup>39,40</sup>. Features of this band are reminiscent of quenched LHCII  
385 aggregates at low temperature<sup>41</sup>, hence it is probably correlated with the fraction of detached  
386 and quenched LHCII observed in ‘sustained quenching’ conditions. This led us to conclude  
387 that this quenching seen in conifers is not only ‘Sustained NPQ’ but also has a different  
388 mechanism.



389 Detailed quantitative energy partitioning analysis of total absorbed light energy by PSII  
390 demonstrates a strong increase (4 fold) of the fraction of constitutive thermal dissipation  
391 ( $\Phi_{NO}$ )<sup>42,43</sup> (Fig 1C-III). Usually, this thermal dissipation ( $\Phi_{NO}$ ) contribution is not explained  
392 by any clear mechanisms. However, in the case of ES samples it is strongly suggested by the  
393 data that the high levels of  $\Phi_{NO}$  do reflect the  $\Delta pH$ -independent “sustained” energy  
394 quenching<sup>8,10,39</sup>. Our lifetime data provide an explanation for the origin of this component: A  
395 very high rate of direct energy transfer from PSII to PSI, provides this delta-pH independent  
396 (non-qE) quenching of PSII. Other photo protective mechanisms proposed, such as, role of  
397 photo-inactivated PSII complexes may also effectively dissipate excess excitation energy as  
398 heat<sup>44</sup>, and since the photoinhibitory quenching (qI), dependent on inactivation and/or  
399 degradation of D1, relaxes within hours (or longer), the process could also be considered a  
400 form of ‘sustained quenching’. Moreover, the involvement of RC quenching, based on  
401 enhanced S2QA- and S2QB- charge recombination, favoring non-radiative PSII RC dissipation  
402 of excess light, has been suggested to supplement or even replace the fast component of non-  
403 photochemical quenching during winter, and thus play a significant role in overwintering  
404 conifers<sup>36,37</sup>. However, we found no indication of photo inhibited PSII centers in the unrelaxed  
405 ES samples that displayed sustained quenching. A component with these characteristics was  
406 not observed in the ES samples. However, even if it would be present it could not explain the  
407 strong quenching effect since this component has longer average lifetime and higher  
408 fluorescence yield than the intact PSII units. In addition, we found no experimental evidence  
409 for PSII RC quenching either. All rate constants obtained from target modeling of the PSII  
410 antenna/RC pools in both unquenched and quenched states are quite normal. Thus, neither  
411 photoinhibition nor RC quenching alone could explain the strong ‘sustained quenching’.  
412 Moreover, changes in Y(I) suggest a lowered activity of PSI, even though PSI activity was less  
413 affected than PSII. In the absence of carbon fixation, one would expect higher acceptor side

414 limitation, but contrastingly we found Y(NA) less affected, and donor side limitation [Y(ND)]  
415 was very high (Compared to S). This makes sense if PSII directly transfers energy to PSI,  
416 making PSI an energy sink for PSII by reducing linear electron flow, and in turn causing PSI  
417 donor side limitation (Oxidised P700) to increase.

418         The detailed structural and functional data presented here enable inference of a coherent  
419 quenching/photoprotection mechanism involving structural rearrangements of the thylakoids.  
420 The model explains Scots pine's acclimation to the combination of harsh freezing temperatures  
421 and high solar radiation that occurs during early spring in northern boreal forests (Fig. 6).  
422 Acclimation to early spring conditions (Fig 6-II) results in massive loss of grana stacks  
423 (destacking) and formation of uniform membrane structures of stromal thylakoids. This allows  
424 for a redistribution and randomization of PSII and PSI. The reduction in the spatial distance  
425 between PSII and PSI complexes increases the probability for direct energy transfer from PSII  
426 to PSI<sup>45-47</sup>. This protective mechanism severely restricts linear electron flow since it strongly  
427 quenches PSII activity. It also has strong similarities to the potent quenching observed in other  
428 extreme environmental conditions when PSII requires strong protection. Examples include  
429 drying-induced quenching in lichen<sup>48</sup> and heat-induced quenching in *Symbiodinium* cells of  
430 coral<sup>49</sup>. In both cases, destacking and reorganization of the thylakoid membrane occur,  
431 resulting in proximity of PSII to PSI complexes with direct energy transfer.

432 In conclusion, during early spring only a very small fraction of the absorbed light energy in  
433 PSII antennae is utilized for PSII photochemistry ( $\Phi$ PSII) and the fast inducible NPQ (qE) is  
434 low since it not only requires a high  $\Delta$ pH<sup>3,6,16</sup> but there is a strong static quenching present  
435 already. On the other hand, thylakoid rearrangement and movement of complexes are likely  
436 coupled to the high zeaxanthin content<sup>50</sup> (SI 6 Table 2), and probably to pronounced  
437 phosphorylation of antenna and core proteins present under these conditions<sup>51</sup>. In this situation,  
438 the excess energy is dissipated primarily through direct energy transfer from PSII to PSI, which

439 appears in steady-state (PAM) fluorescence measurements as a non-regulated constitutive  
440 energy quenching. An additional, albeit smaller, amount of quenching and photoprotection is  
441 provided under sustained quenching conditions by the qE mechanism in functionally detached  
442 LHCII. It is possible that this fraction is linked to large aggregates containing LHCII, PsbS and  
443 other small proteins, previously detected in cold-adapted pine needles<sup>52</sup>. Thus, conifers appear  
444 to have a powerful protective mechanism that resembles those found in other photosynthetic  
445 organisms of relatively harsh environments<sup>48,49</sup>. This protective mechanism plays a crucial role  
446 in the survival of pine from harsh boreal winters.

447

## 448 **Material and methods**

449

450 ***Weather.*** Weather data were recorded from October 2015 to May 2016, from November 2016  
451 to June 2017, and from October 2017 to June 2018 on an hourly basis at the weather station of  
452 the Sweden's meteorological and hydrological institute, Umeå stations. (available on  
453 <https://www.smhi.se>).

454 ***Plant material and sampling.*** Fully developed needles were collected frequently, from Oct  
455 2015 to May 2016, from Nov 2016 to June 2017 and Oct 2017 to June 2018, inclusive, at  
456 midday (8.00-10.00) from fully exposed south-facing branches of five Scots pine (*Pinus*  
457 *sylvestris* L.) trees growing on Umeå University campus (63° 49' N, 20° 18' E). The collected  
458 needles were immediately stored in darkness, at 0-5°C, in a laboratory at Umeå Plant Science  
459 Centre, and subjected to measurements (described in the following sections) shortly after  
460 sampling to minimize any further changes in the photosynthetic machinery. For recovery  
461 treatment samples from winter-stressed branches were collected in mid-March and subjected  
462 to recovery treatment, involving exposure to very low light (80  $\mu\text{mol photons m}^{-2}\text{s}^{-1}$ ) at 20°C<sup>52</sup>.

463 Further details are provided (together with other details regarding the sampling dates and  
464 procedures) in SI 1.

465 ***Modulated chlorophyll fluorescence and (P700+) measurements.*** Chlorophyll fluorescence  
466 was measured using a Dual-PAM-100 instrument (Heinz Walz GmbH, Effeltrich, Germany)  
467 at room temperature (20°C) after 30 min dark adaptation at low temperature [below 5°C, winter  
468 samples (samples collected during November to May)] or room temperature [(20°C, summer  
469 samples (samples collected during June to October)]. Maximum photochemical efficiency of  
470 PSII was calculated as  $F_v/F_m = (F_m - F_o)/F_m$ . To perform all measurements, we chose to  
471 record a light response curve where we measured  $F_v/F_m$  first, followed by  $P_m$  (maximal P700  
472 oxidation), and then changing the actinic light intensity stepwise from 33 $\mu$ E to 1469 $\mu$ E. During  
473 recording light response curve, samples were kept in one light intensity for 3 mins followed by  
474 a saturating pulse of 4000 $\mu$ E to get the optimal values. Partitioning of absorbed light energy  
475 was estimated as  $\Phi_{PSII} + \Phi_{NPQ} + \Phi_{NO} = 1$ <sup>42,43</sup>. The effective photochemical quantum yield  
476 of PSI,  $Y(I)$ , was calculated as  $Y(I) = 1 - (Y(ND) + Y(NA))$ <sup>53</sup>. Here,  $Y(I)$  is the effective quantum  
477 yield of PSI ( $\Phi_{PSI}$ ) when reaction centers (RCs) are open with reduced donor side (P700) and  
478 oxidized acceptor side (A);  $Y(NA)$  is the energy dissipation due to acceptor side limitation,  
479 reflecting the redox state of the acceptor side when RCs are closed with P700 reduced and both  
480 acceptors reduced; and  $Y(ND)$  is the energy dissipation due to donor side limitation, reflecting  
481 the redox state with both P700 and A oxidized.

482 ***Ultrafast fluorescence measurements.*** Intact needles were subjected to ultrafast time-  
483 correlated single photon counting measurements at -20 °C in a rotation cuvette, as previously  
484 described<sup>16,17</sup>. Pine needles were immersed in 60% PEG solution (pH 7.5), which was used as  
485 an anti-freeze. Tests confirmed that this solution did not significantly affect either the  $F_v/F_m$   
486 values or fluorescence kinetics. These conditions allowed maintenance of the physiological and  
487 quenching states for a long time during the measurements and prevention of radiation damage

488 or further quenching induction by the very weak measuring light. Needles sampled in summer  
489 (S needles) were measured in both unquenched and fully light-quenched states. For  
490 measurement in the unquenched state, they were dark-adapted for 30 min, then quickly frozen  
491 to  $-20^{\circ}\text{C}$  in the rotation cuvette. For measurement in the light-quenched state, the needles were  
492 illuminated by red light (intensity  $1000\ \mu\text{mol m}^{-2}\text{sec}^{-1}$ ) for 30 min. at room temperature. During  
493 this time, fluorescence intensity was monitored and after 30 min. a steady-state level was  
494 reached. The needles were then frozen quickly under illumination in the rotation cuvette to -  
495  $20^{\circ}\text{C}$ . Early spring samples (ES samples) were measured either in the original ‘sustained  
496 quenching state’ by transferring them directly at  $-20^{\circ}\text{C}$  into the cooled rotation cuvette (SI  
497 4.1), or in a ‘recovery state’ induced by exposing them to very low light ( $80\ \mu\text{mol m}^{-2}\text{s}^{-1}$ ) at  
498  $20^{\circ}\text{C}$ , as described earlier, then freezing them (as in the measurements of the summer needles  
499 in unquenched state). After each fluorescence lifetime measurement, the samples were fast-  
500 frozen in liquid nitrogen and stored at  $-80^{\circ}\text{C}$  for further pigment analysis. The laser settings  
501 for the measurements were 40-60  $\mu\text{W}$  power, 4 MHz repetition rate, and 1 mm diameter beam  
502 size.

503 ***Pigment and protein analysis.*** Pigments were extracted from frozen pine needles with 80%  
504 acetone. Chl a/b and Chl/carotenoid ratios were calculated by fitting the extracts’ absorption  
505 spectra with the spectra of the individual pigments, and the relative amounts of carotenoids  
506 were determined by HPLC as previously described<sup>54</sup>. For protein composition analysis intact  
507 thylakoids were isolated followed by Grebe et al. 2018<sup>55</sup>, subjected to SDS PAGE separation  
508 followed by Damkjær et al. 2009<sup>56</sup> and immunoblotted against Anti PsbD, PsaD, Lhcb2 and  
509 Lhcb4 as per manufacturer’s instructions (Agrisera AB, Sweden).

510 ***Transmission electron microscopy.*** Thin slices ( $< 0.5\ \text{mm}$ ) from the middle region of pine  
511 needles were cut in tap water and fixed in 4% paraformaldehyde, 2.5% glutaraldehyde (TAAB  
512 Laboratories, Aldermaston, England) in 0.1M or 0.05M (May and June) sodium cacodylate

513 buffer, pH 7.4 (TAAB Laboratories, Aldermaston, England). Thoroughly washed samples  
514 were post-fixed in 1% osmium tetroxide (TAAB Laboratories, Aldermaston, England). The  
515 fixed material was dehydrated in ethanol series with increasing concentrations and propylene  
516 oxide and finally embedded in Spurr resin (TAAB Laboratories, Aldermaston, England).  
517 Ultrathin sections (70 nm) were post contrasted in uranyl acetate and Reynolds lead citrate and  
518 further examined with Talos 120C electron microscope (FEI, Eindhoven, The Netherlands)  
519 operating at 120kV. Micrographs were acquired with a Ceta 16M CCD camera (FEI,  
520 Eindhoven, The Netherlands) using TEM Image & Analysis software ver. 4.14 (FEI,  
521 Eindhoven, The Netherlands). The chloroplast ultrastructure was analyzed from the electron  
522 micrographs by measuring the average number of chloroplasts per cell, average number of  
523 grana per chloroplasts and average number of appressed thylakoids per grana stack (Ng)<sup>57,58</sup>.

524 ***Statistical analysis.*** The significance of between-mean differences was assessed by t-tests and  
525 p values were recorded. One (\*), two (\*\*), and three (\*\*\*) asterisks in the presented figures  
526 indicate  $P \leq 95\%$ ,  $P \leq 99\%$ , and  $P \leq 99.90\%$ , respectively, for fluorescent and electron microscopic  
527 measurements.

528

529

530

531

532

533

534

535

536

537

538 **Acknowledgements:**

539 This work was supported by SE2B Horizon 2020 under grant agreement no. 675006 (SE2B) to  
540 SJ (Umeå University) and RC (Vrije Universiteit Amsterdam), the Swedish Research council  
541 (VR) and the Kempe foundation to SJ and the Netherlands Organization for Scientific Research  
542 (NWO-Vici grant to RC).

543

544

545 **Author Contributions:**

546 SJ and ARH conceived the idea; PB, AGI, ARH, and SJ designed the experiments; PB, ZZ, SP  
547 and TS performed the chlorophyll fluorescence and P700 experiments; PB performed TEM  
548 studies and protein quantification; PB and AGI analysed chlorophyll fluorescence data; VC  
549 performed ultrafast time-resolved fluorescence measurements; VC and ARH analyzed the  
550 time-resolved fluorescence data; PB, VC, AGI, ARH, RC and SJ analysed and discussed all  
551 results; PB, AGI, VC, ARH and SJ wrote the paper.

552

553

554

555

556

557

558

559

560

561

562

563 **References**

- 564 1. Gowthrop D. *Vanishing Halo*. Greystone Books; 2009.  
565 <https://books.google.se/books?id=t-SDCgAAQBAJ>
- 566 2. Nystedt B, Street NR, Wetterbom A, et al. The Norway spruce genome sequence and  
567 conifer genome evolution. *Nature*. 2013;497(7451):579-584.
- 568 3. Li X-P, BjoÈrkman O, Shih C, et al. A pigment-binding protein essential for regulation  
569 of photosynthetic light harvesting. *Nature*. 2000;403(6768):391-395.
- 570 4. Jahns P, Holzwarth AR. The role of the xanthophyll cycle and of lutein in  
571 photoprotection of photosystem II. *Biochim Biophys Acta (BBA)-Bioenergetics*.  
572 2012;1817(1):182-193.
- 573 5. Malnoë A. Photoinhibition or photoprotection of photosynthesis? Update on the  
574 (newly termed) sustained quenching component qH. *Environ Exp Bot*. 2018;154:123-  
575 133.
- 576 6. Niyogi KK. Photoprotection revisited: genetic and molecular approaches. *Annu Rev*  
577 *Plant Biol*. 1999;50(1):333-359.
- 578 7. Horton P, Ruban A V, Walters RG. Regulation of light harvesting in green plants.  
579 *Annu Rev Plant Biol*. 1996;47(1):655-684.
- 580 8. Öquist G, Huner NPA. Photosynthesis of overwintering evergreen plants. *Annu Rev*  
581 *Plant Biol*. 2003;54(1):329-355.
- 582 9. Yang Q, Blanco NE, Hermida-Carrera C, Lehotai N, Hurry V, Strand Å. Two  
583 dominant boreal conifers use contrasting mechanisms to reactivate photosynthesis in  
584 the spring. *Nat Commun*. 2020;11(1):1-12.
- 585 10. Verhoeven A. Sustained energy dissipation in winter evergreens. *New Phytol*.  
586 2014;201(1):57-65.
- 587 11. Harsch MA, Zhou Y, HilleRisLambers J, Kot M. Keeping pace with climate change:



- 588 stage-structured moving-habitat models. *Am Nat.* 2014;184(1):25-37.
- 589 12. Demmig-Adams B, Adams III WW. Photoprotection in an ecological context: the  
590 remarkable complexity of thermal energy dissipation. *New Phytol.* 2006;172(1):11-21.
- 591 13. Krol M, Hurry VM, Maxwell DP, Malek L, Ivanov AG, Huner NPA. Low growth  
592 temperature inhibition of photosynthesis in cotyledons of jack pine seedlings (*Pinus*  
593 *banksiana*) is due to impaired chloroplast development. *Can J Bot.* 2002;80(10):1042-  
594 1051.
- 595 14. Genty B, Briantais J-M, Baker NR. The relationship between the quantum yield of  
596 photosynthetic electron transport and quenching of chlorophyll fluorescence. *Biochim*  
597 *Biophys Acta (BBA)-General Subj.* 1989;990(1):87-92.
- 598 15. Tiwari A, Mamedov F, Grieco M, et al. Photodamage of iron–sulphur clusters in  
599 photosystem I induces non-photochemical energy dissipation. *Nat Plants.* 2016;2(4):1-  
600 9.
- 601 16. Holzwarth AR, Miloslavina Y, Nilkens M, Jahns P. Identification of two quenching  
602 sites active in the regulation of photosynthetic light-harvesting studied by time-  
603 resolved fluorescence. *Chem Phys Lett.* 2009;483(4-6):262-267.
- 604 17. Chukhutsina VU, Holzwarth AR, Croce R. Time-resolved fluorescence measurements  
605 on leaves: principles and recent developments. *Photosynth Res.* 2019;140(3):355-369.
- 606 18. Van Stokkum IHM, Larsen DS, Van Grondelle R. Global and target analysis of time-  
607 resolved spectra. *Biochim Biophys Acta (BBA)-Bioenergetics.* 2004;1657(2-3):82-104.
- 608 19. Chukhutsina VU, Liu Xin, Xu Pengqi CR. The major light-harvesting complex  
609 (LHCII) is an antenna of photosystem I in dark-adapted plants. *Nat Plants.* Published  
610 online 2020. doi:10.1038/s41477-020-0693-4
- 611 20. Croce R, Dorra D, Holzwarth AR, Jennings RC. Fluorescence decay and spectral  
612 evolution in intact photosystem I of higher plants. *Biochemistry.* 2000;39(21):6341-

- 613 6348.
- 614 21. Wientjes E, Van Stokkum IHM, Van Amerongen H, Croce R. Excitation-energy  
615 transfer dynamics of higher plant photosystem I light-harvesting complexes. *Biophys J.*  
616 2011;100(5):1372-1380.
- 617 22. Holzwarth AR. Data analysis of time-resolved measurements. In: *Biophysical*  
618 *Techniques in Photosynthesis*. Springer; 1996:75-92.
- 619 23. Holzwarth AR, Müller MG, Niklas J, Lubitz W. Ultrafast transient absorption studies  
620 on photosystem I reaction centers from *Chlamydomonas reinhardtii*. 2: mutations near  
621 the P700 reaction center chlorophylls provide new insight into the nature of the  
622 primary electron donor. *Biophys J.* 2006;90(2):552-565.
- 623 24. Miloslavina Y, Szczepaniak M, Müller MG, et al. Charge separation kinetics in intact  
624 photosystem II core particles is trap-limited. A picosecond fluorescence study.  
625 *Biochemistry.* 2006;45(7):2436-2442.
- 626 25. Slavov C, Ballottari M, Morosinotto T, Bassi R, Holzwarth AR. Trap-limited charge  
627 separation kinetics in higher plant photosystem I complexes. *Biophys J.*  
628 2008;94(9):3601-3612.
- 629 26. Szczepaniak M, Sander J, Nowaczyk M, Müller MG, Rögner M, Holzwarth AR.  
630 Charge separation, stabilization, and protein relaxation in photosystem II core particles  
631 with closed reaction center. *Biophys J.* 2009;96(2):621-631.
- 632 27. Miloslavina Y, Wehner A, Lambrev PH, et al. Far-red fluorescence: A direct  
633 spectroscopic marker for LHClI oligomer formation in non-photochemical quenching.  
634 *FEBS Lett.* 2008;582(25-26):3625-3631.
- 635 28. Ware MA, Giovagnetti V, Belgio E, Ruban A V. PsbS protein modulates non-  
636 photochemical chlorophyll fluorescence quenching in membranes depleted of  
637 photosystems. *J Photochem Photobiol B Biol.* 2015;152:301-307.

- 638 29. Lambrev PH, Miloslavina Y, Jahns P, Holzwarth AR. On the relationship between  
639 non-photochemical quenching and photoprotection of photosystem II. *Biochim*  
640 *Biophys Acta (BBA)-Bioenergetics*. 2012;1817(5):760-769.
- 641 30. Khorobrykh S, Havurinne V, Mattila H, Tyystjärvi E. Oxygen and ROS in  
642 Photosynthesis. *Plants*. 2020;9(1):91.
- 643 31. Parker J, Philpott DE. An electron microscopic study of chloroplast condition in  
644 summer and winter in *Pinus strobus*. *Protoplasma*. 1961;53(4):575-583.
- 645 32. MARTIN B, ÖQUIST G. Seasonal and experimentally induced changes in the  
646 ultrastructure of chloroplasts of *Pinus silvestris*. *Physiol Plant*. 1979;46(1):42-49.
- 647 33. Verhoeven A, Osmolak A, Morales P, Crow J. Seasonal changes in abundance and  
648 phosphorylation status of photosynthetic proteins in eastern white pine and balsam fir.  
649 *Tree Physiol*. 2009;29(3):361-374.
- 650 34. Huner N, Dahal K, Hollis L, et al. Chloroplast redox imbalance governs phenotypic  
651 plasticity: the “grand design of photosynthesis” revisited. *Front Plant Sci*. 2012;3:255.
- 652 35. Nilkens M, Kress E, Lambrev P, et al. Identification of a slowly inducible zeaxanthin-  
653 dependent component of non-photochemical quenching of chlorophyll fluorescence  
654 generated under steady-state conditions in *Arabidopsis*. *Biochim Biophys Acta (BBA)-*  
655 *Bioenergetics*. 2010;1797(4):466-475.
- 656 36. Ivanov A, Sane P, Zeinalov Y, Simidjiev I, Huner N, Öquist G. Seasonal responses of  
657 photosynthetic electron transport in Scots pine (*Pinus sylvestris* L.) studied by  
658 thermoluminescence. *Planta*. 2002;215(3):457-465.
- 659 37. Sveshnikov D, Ensminger I, Ivanov AG, et al. Excitation energy partitioning and  
660 quenching during cold acclimation in Scots pine. *Tree Physiol*. 2006;26(3):325-336.
- 661 38. Tikkanen M, Aro E-M. Integrative regulatory network of plant thylakoid energy  
662 transduction. *Trends Plant Sci*. 2014;19(1):10-17.

- 663 39. Gilmore AM, Ball MC. Protection and storage of chlorophyll in overwintering  
664 evergreens. *Proc Natl Acad Sci*. 2000;97(20):11098-11101.
- 665 40. Gilmore AM, Matsubara S, Ball MC, Barker DH, Itoh S. Excitation energy flow at 77  
666 K in the photosynthetic apparatus of overwintering evergreens. *Plant Cell Environ*.  
667 2003;26(7):1021-1034.
- 668 41. Ostroumov EE, Götze JP, Reus M, Lambrev PH, Holzwarth AR. Characterization of  
669 fluorescent chlorophyll charge-transfer states as intermediates in the excited state  
670 quenching of light-harvesting complex II. *Photosynth Res*. Published online 2020:1-23.
- 671 42. Kramer DM, Johnson G, Kiirats O, Edwards GE. New fluorescence parameters for the  
672 determination of Q A redox state and excitation energy fluxes. *Photosynth Res*.  
673 2004;79(2):209.
- 674 43. Hendrickson L, Furbank RT, Chow WS. A simple alternative approach to assessing  
675 the fate of absorbed light energy using chlorophyll fluorescence. *Photosynth Res*.  
676 2004;82(1):73.
- 677 44. Krause GH. Photoinhibition of photosynthesis. An evaluation of damaging and  
678 protective mechanisms. *Physiol Plant*. 1988;74(3):566-574.
- 679 45. Barber J. An explanation for the relationship between salt-induced thylakoid stacking  
680 and the chlorophyll fluorescence changes associated with changes in spillover of  
681 energy from photosystem II to photosystem I. *FEBS Lett*. 1980;118(1):1-10.
- 682 46. Barber J. Influence of surface charges on thylakoid structure and function. *Annu Rev*  
683 *Plant Physiol*. 1982;33(1):261-295.
- 684 47. Barber J. Photosynthetic energy conversion: natural and artificial. *Chem Soc Rev*.  
685 2009;38(1):185-196. doi:10.1039/B802262N
- 686 48. Slavov C, Reus M, Holzwarth AR. Two different mechanisms cooperate in the  
687 desiccation-induced excited state quenching in *Parmelia* lichen. *J Phys Chem B*.

- 688 2013;117(38):11326-11336.
- 689 49. Slavov C, Schrameyer V, Reus M, et al. “Super-quenching” state protects  
690 Symbiodinium from thermal stress—implications for coral bleaching. *Biochim*  
691 *Biophys Acta (BBA)-Bioenergetics*. 2016;1857(6):840-847.
- 692 50. Vajravel S, Kis M, Kłodawska K, et al. Zeaxanthin and echinenone modify the  
693 structure of photosystem I trimer in *Synechocystis* sp. PCC 6803. *Biochim Biophys*  
694 *Acta (BBA)-Bioenergetics*. 2017;1858(7):510-518.
- 695 51. Merry R, Jerrard J, Frebault J, Verhoeven A. A comparison of pine and spruce in  
696 recovery from winter stress; changes in recovery kinetics, and the abundance and  
697 phosphorylation status of photosynthetic proteins during winter. *Tree Physiol*.  
698 2017;37(9):1239-1250.
- 699 52. Ottander C, Campbell D, Öquist G. Seasonal changes in photosystem II organisation  
700 and pigment composition in *Pinus sylvestris*. *Planta*. 1995;197(1):176-183.
- 701 53. Schreiber U. Saturation pulse method for assessment of energy conversion in PSI.  
702 *PAM Appl Notes*. 2008;1:11-14.
- 703 54. Xu P, Tian L, Kloz M, Croce R. Molecular insights into Zeaxanthin-dependent  
704 quenching in higher plants. *Sci Rep*. 2015;5(1):1-10.
- 705 55. Grebe S, Trotta A, Bajwa AA, et al. The unique photosynthetic apparatus of Pinaceae:  
706 analysis of photosynthetic complexes in *Picea abies*. *J Exp Bot*. 2019;70(12):3211-  
707 3225.
- 708 56. Damkjær JT, Kereiche S, Johnson MP, et al. The photosystem II light-harvesting  
709 protein Lhcb3 affects the macrostructure of photosystem II and the rate of state  
710 transitions in *Arabidopsis*. *Plant Cell*. 2009;21(10):3245-3256.
- 711 57. Ivanov AG, Ignatova NS, Christov AM. Comparative ultrastructural and fluorescence  
712 studies of grapevine (*Vitis vinifera* L.) chloroplasts isolated from stem and leaf tissues.

713 *Plant Sci.* 1990;67(2):253-257.

714 58. Ivanov AG, Kitcheva MI, Christov AM, Popova LP. Effects of abscisic acid treatment  
715 on the thermostability of the photosynthetic apparatus in barley chloroplasts. *Plant*  
716 *Physiol.* 1992;98(4):1228-1232.

717

718

719

720

721

722

723

724

725

726

727

728

729

730

731

732

733

734

735

736

737

738 Fig 1. Bag et al 2020

A. Weather during three measuring periods

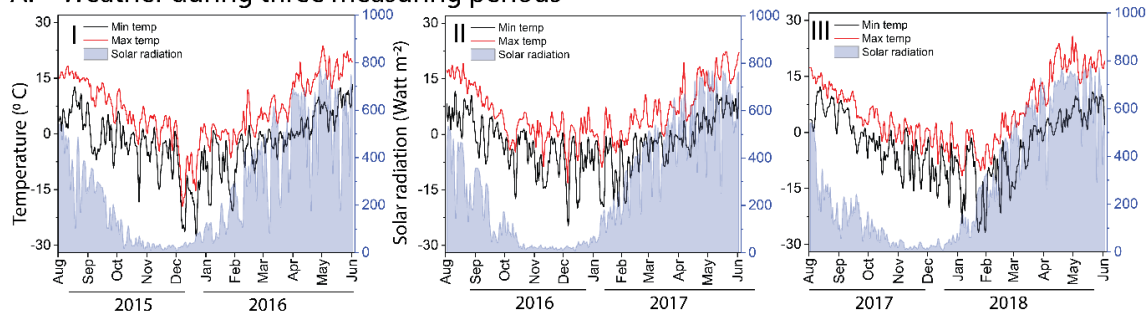

B. Fluorescence intensities of PSII

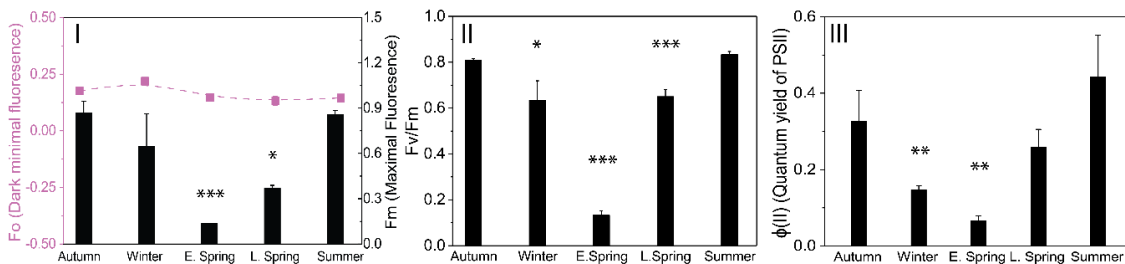

C. Regulated and non-regulated energy dissipation

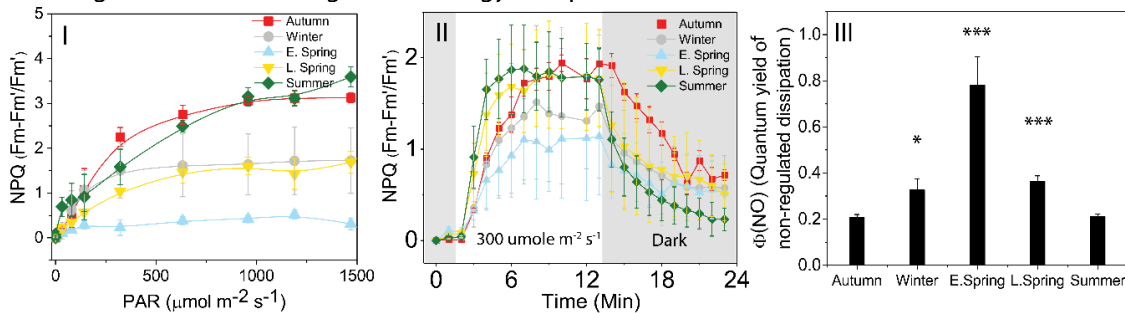

D. Recovery of PSII under artificial conditions

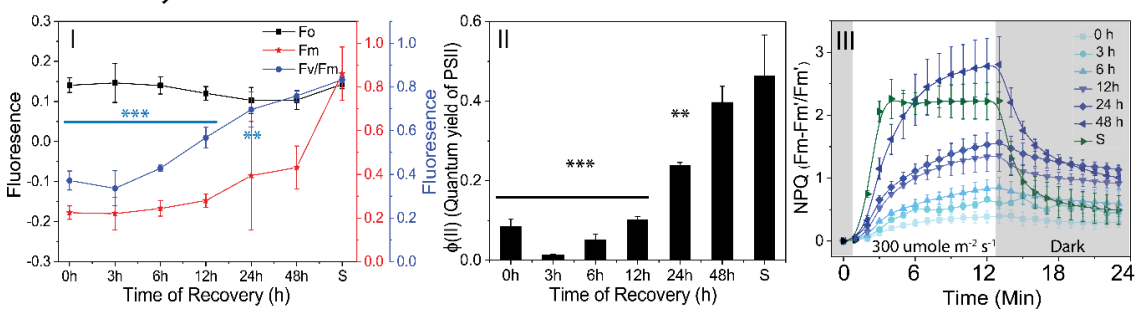

739

740 **Figure 1. Seasonal dynamics of weather and photochemical performance of PSII measured by chlorophyll**  
 741 **fluorescence in Scots pine needles** | A. Changes in temperature (°C) (Left Y axis) and solar radiation (watt m<sup>-2</sup>)  
 742 (Right Y axis) during 2015-2016 (I), 2016-2017 (II), 2017-2018 (III) measuring seasons. B. Seasonal dynamics  
 743 of PSII photochemistry: (I) Changes in maximal (Fm) and basic (Fo) fluorescence. (II) Maximal quantum  
 744 efficiency of PSII measured as Fv/Fm (III) Effective quantum yield of PSII (Φ(II)). C. Energy dissipation  
 745 measured as regulated and non-regulated non photochemical quenching. (I) Changes in NPQ with increasing PAR  
 746 (II) Induction of NPQ with constant actinic light, (III) Quantum yield of non-regulated non photochemical  
 747 quenching. D. Recovery of pine needles under artificial conditions at 80 μmol photons m<sup>-2</sup> s<sup>-1</sup> of light for 48h with  
 748 18/6 photoperiod (I) Changes in Fo, Fm and Fv/Fm, (II) Changes in Φ(II), (III) Induction of NPQ with constant  
 749 actinic light of 300 μmol photons m<sup>-2</sup> s<sup>-1</sup>. All measurements were taken after 30 mins of dark adaptation at 4°C in  
 750 winter and room temperature in summer. All data are means ± SD (n = 3-5) and the statistically significant  
 751 differences are marked by asterisks: \* - p ≤ 95%; \*\* - p ≤ 99%; \*\*\* - p ≤ 99.9%.

752 Fig 2. Bag et al. 2020

A. Energy partitioning in PSI

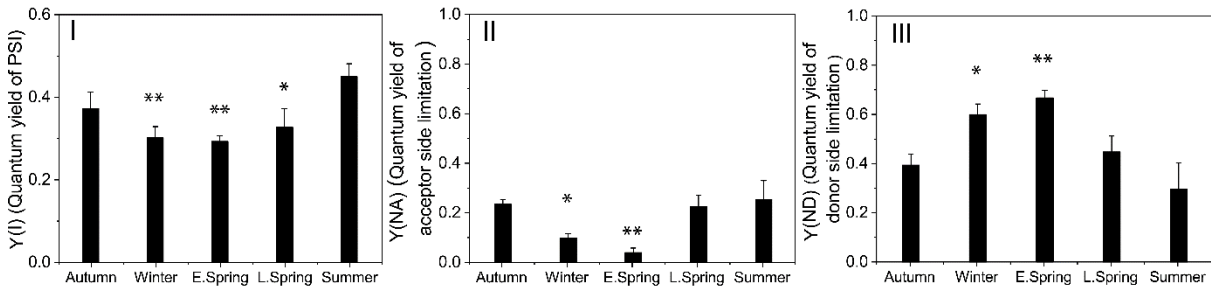

B. Recovery of PSI under ambient conditions

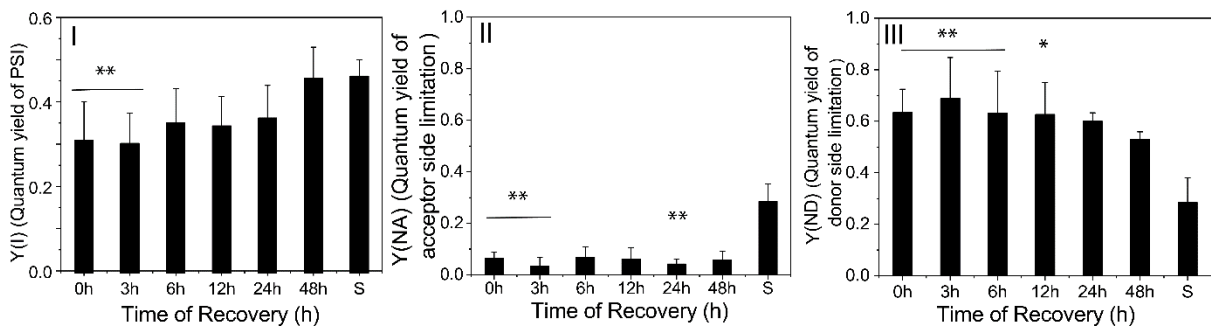

753

754 **Figure 2. Seasonal changes of PSI photochemistry in Scots pine needles** | A. Energy distribution in PSI  
 755 considering  $Y(I)+Y(ND)+Y(NA) = 1$ , where Y(I) (I), Y(NA) (II) and Y(ND) (III) are photochemical quantum  
 756 yield of PSI (when P700 is reduced and A is oxidised), energy dissipation in PSI (measure of acceptor side  
 757 limitation, when P700 and A both are reduced) and energy dissipation in PSI (measure of donor side limitation,  
 758 when P700 and A both are oxidised), respectively. B. Recovery of PSI photochemistry under ambient conditions:  
 759 (I) Y(I), (II) Y(NA), (III) Y(ND) of PSI during the recovery period. All measurements were taken after 30 mins  
 760 of dark adaptation at 4°C in winter and room temperature in summer. All data are means  $\pm$  SD (n = 3-5) and the  
 761 statistically significant differences are marked by asterisks: \* -  $p \leq 95\%$ ; \*\* -  $p \leq 99\%$ .

762

763

764

765

766

767

768

769



770 Fig 3. Bag et al 2020

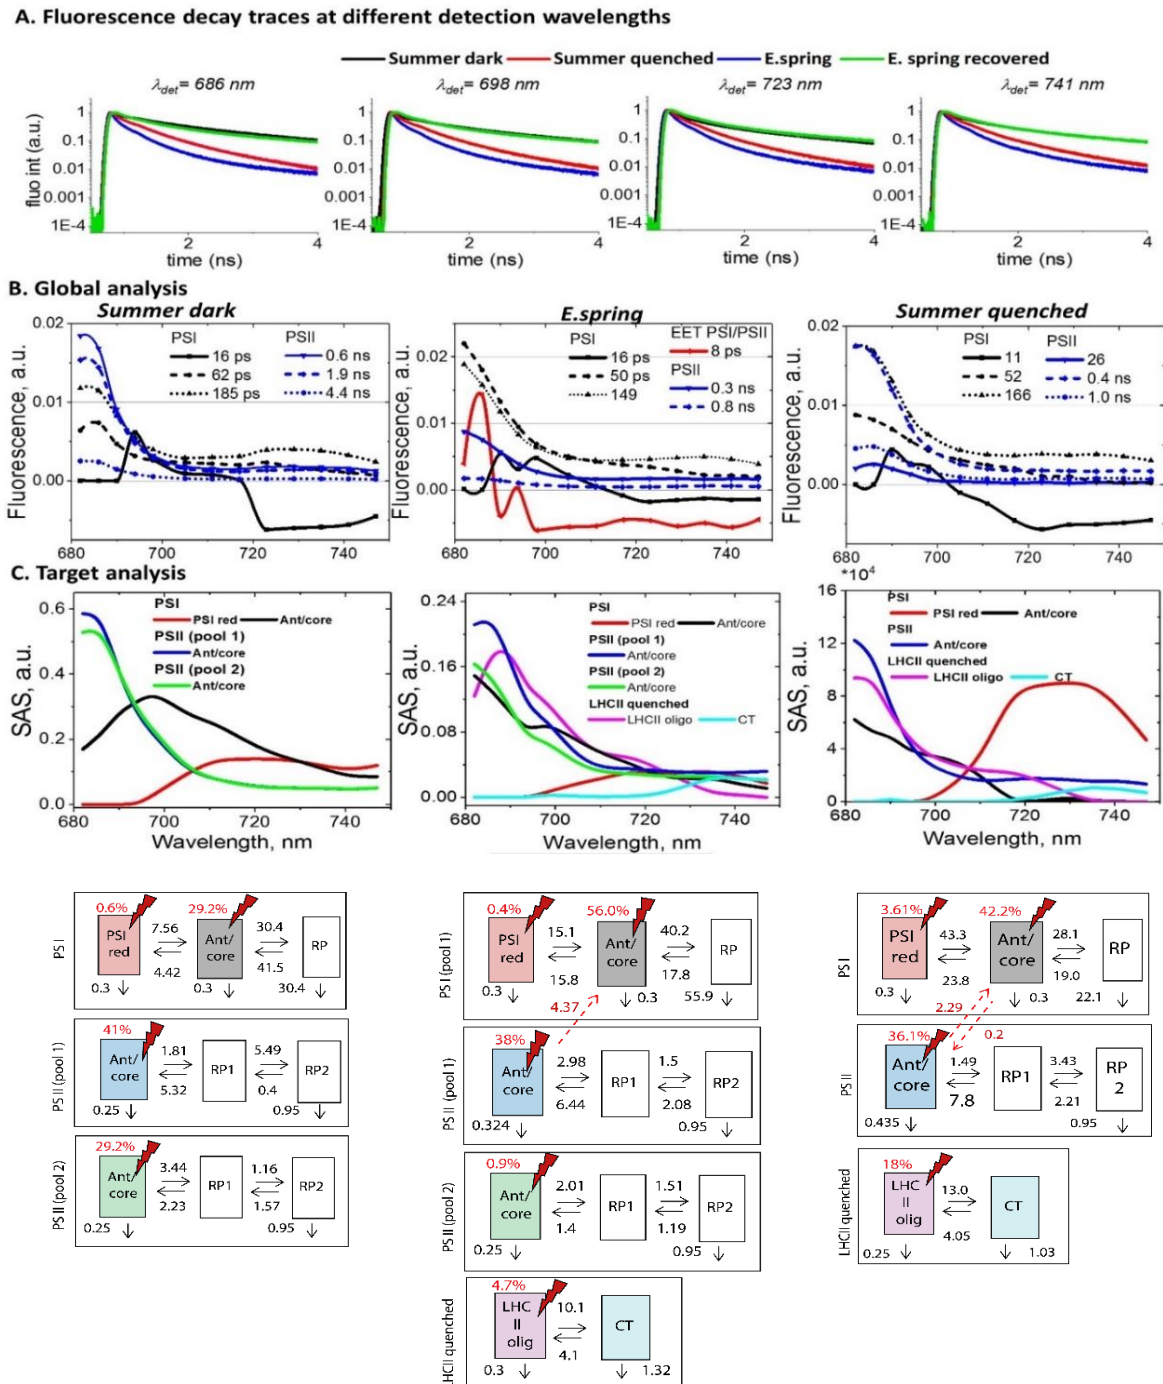

771 **Fig 3. Time-resolved fluorescence of intact pine needles measured using TCSPC** (A) Fluorescence decay  
 772 traces measured at  $-20^{\circ}\text{C}$  and at four characteristic wavelengths: 686 nm (mainly PSII, LHCII contributions), 698  
 773 nm (PSII, PSI contributions), 723 nm (mainly PSI contribution), and 741 nm (mainly PSI contribution). (B) Global  
 774 analysis of pine needles in three states: Summer dark (S, dark-adapted summer needles, left row), ES (E.spring  
 775 needles with “sustained quenching” present, middle row), Summer quenched (SQ, right row) (C) Kinetic target  
 776 analysis of pine needles in the three states. The kinetic target modeling analysis (SAS top, kinetic model with rate constants  
 777 in  $\text{ns}^{-1}$ , bottom) shows the results of the detailed target modeling of the fluorescence kinetics of pine needles. The  
 778 rate constants ( $\text{ns}^{-1}$ ) were determined from global target modeling analysis. Species-associated emission spectra (SAS)  
 779 resulted from the fit of the target kinetic model in the corresponding state. *Note* that fluorescence decay  
 780 measurements below 680 nm to detect the decreasing short-wavelength part of the spectra were not possible due  
 781 to the extremely high scattering of the pine needles. This has no effect however on the ability to distinguish the  
 782 various lifetime components kinetically and spectrally.

783 Fig 4. Bag et al 2020

A. Seasonal changes in chloroplast ultrastructure

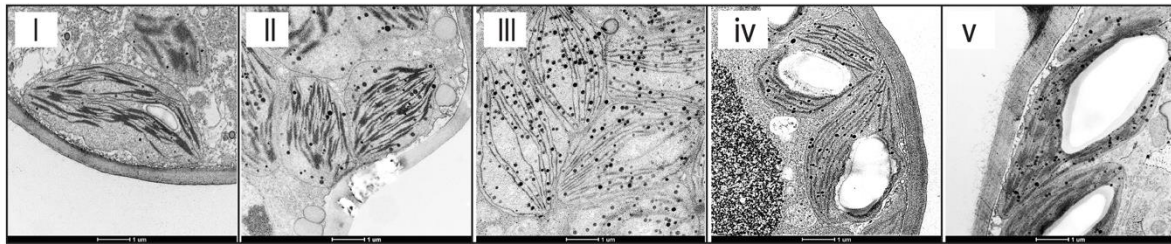

B. Changes in thylakoid layers in grana

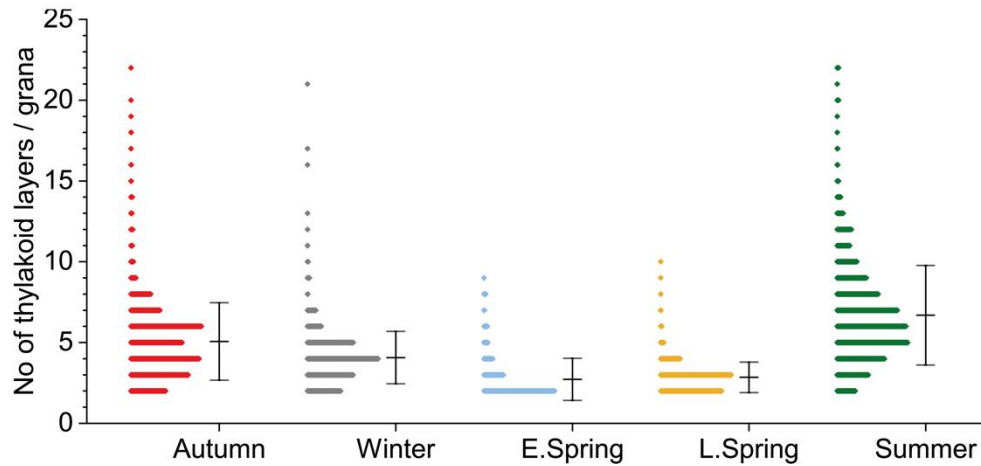

784

785 **Figure 4. Transmission electron microphotographs depicting seasonal variations in chloroplast**  
786 **ultrastructure in pine needles A.** Chloroplast structure in (I) Autumn (II) Winter (III) E. Spring (IV) L. Spring  
787 and (V) Summer. **B.** Histograms of frequency distributions of numbers of thylakoids per granum during the five  
788 distinct seasonal periods. The histograms were calculated from 80-100 electron micrographs per season,  
789 representing 2-3 chloroplasts per image (Error bars represent SD calculated from 800-1000 stacks per season).

790

791

792

793

794

795

796

797

798

799

800

801 Fig 5. Bag et al 2020

A. Changes in Chloroplast ultrastructure

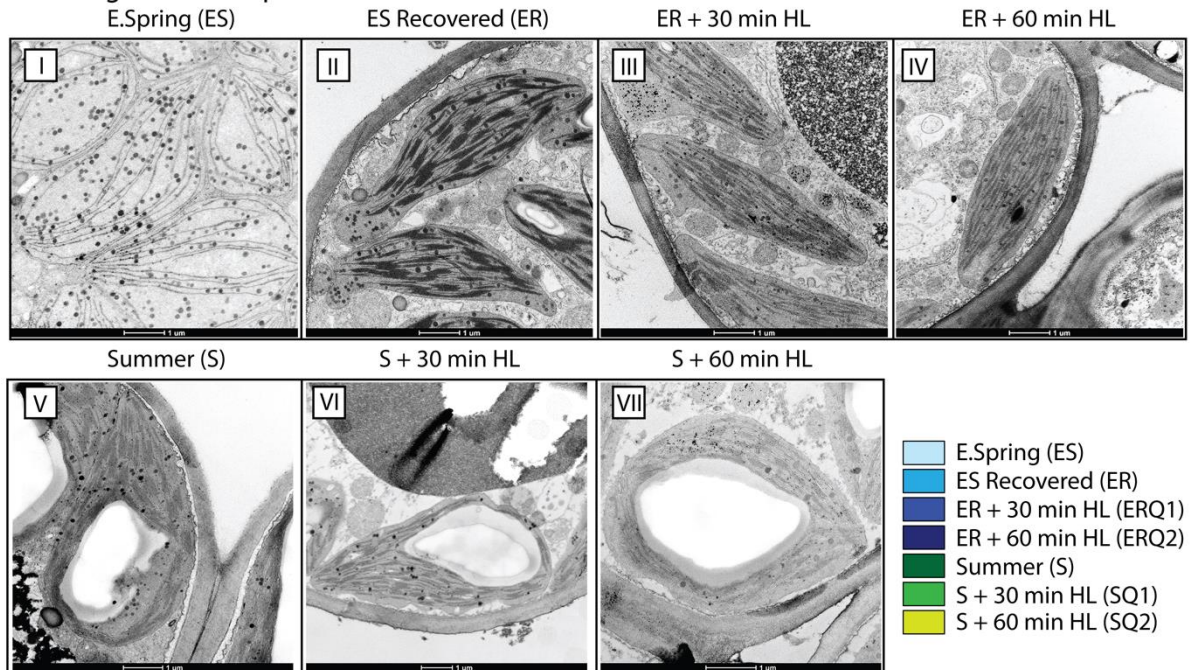

B. Changes in grana thylakoids

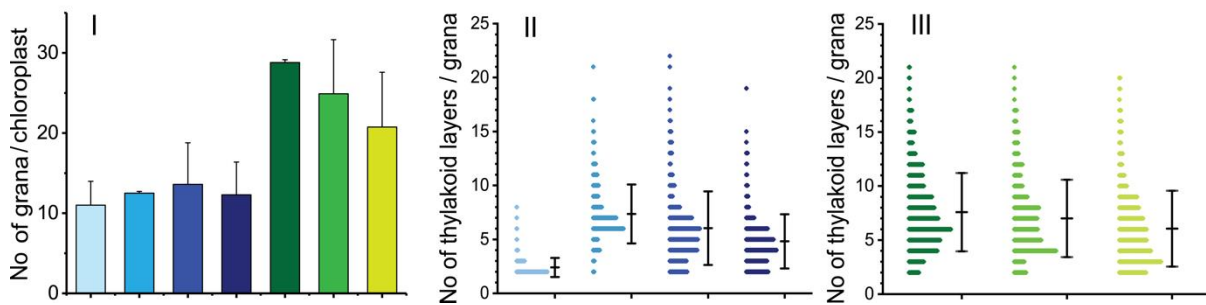

802

803 **Figure 5. Artificial induction of changes in chloroplast ultrastructure of pine needles** | A. Changes  
 804 in chloroplast ultrastructure in (I) E. spring (ES), (II) E. spring samples recovered (ER) at 18°C for 48  
 805 hours with a photoperiod of 18 h at  $80 \mu\text{mol m}^{-2}\text{s}^{-1}$ , (III) ER samples treated with  $800 \mu\text{mol m}^{-2}\text{s}^{-1}$   
 806 high light for 30 min (ERQ1), (IV) for 60 min (ERQ2). (V) Summer (S), (VI) Summer samples treated  
 807 with  $1200 \mu\text{mol m}^{-2}\text{s}^{-1}$  high light for 30 min (SQ1), (IV) for 60 min (SQ2). B. The number of grana  
 808 per chloroplasts (40 images typically containing 2-3 chloroplast per image) (I); Histograms of frequency  
 809 distributions of numbers of thylakoids per granum in different (II) E. spring treated (III) Summer treated  
 810 samples. Error bars represent SD obtained from analysis of 460-540 grana stacks.

811

812

813

814

815

816 Fig 6. Bag et al 2020

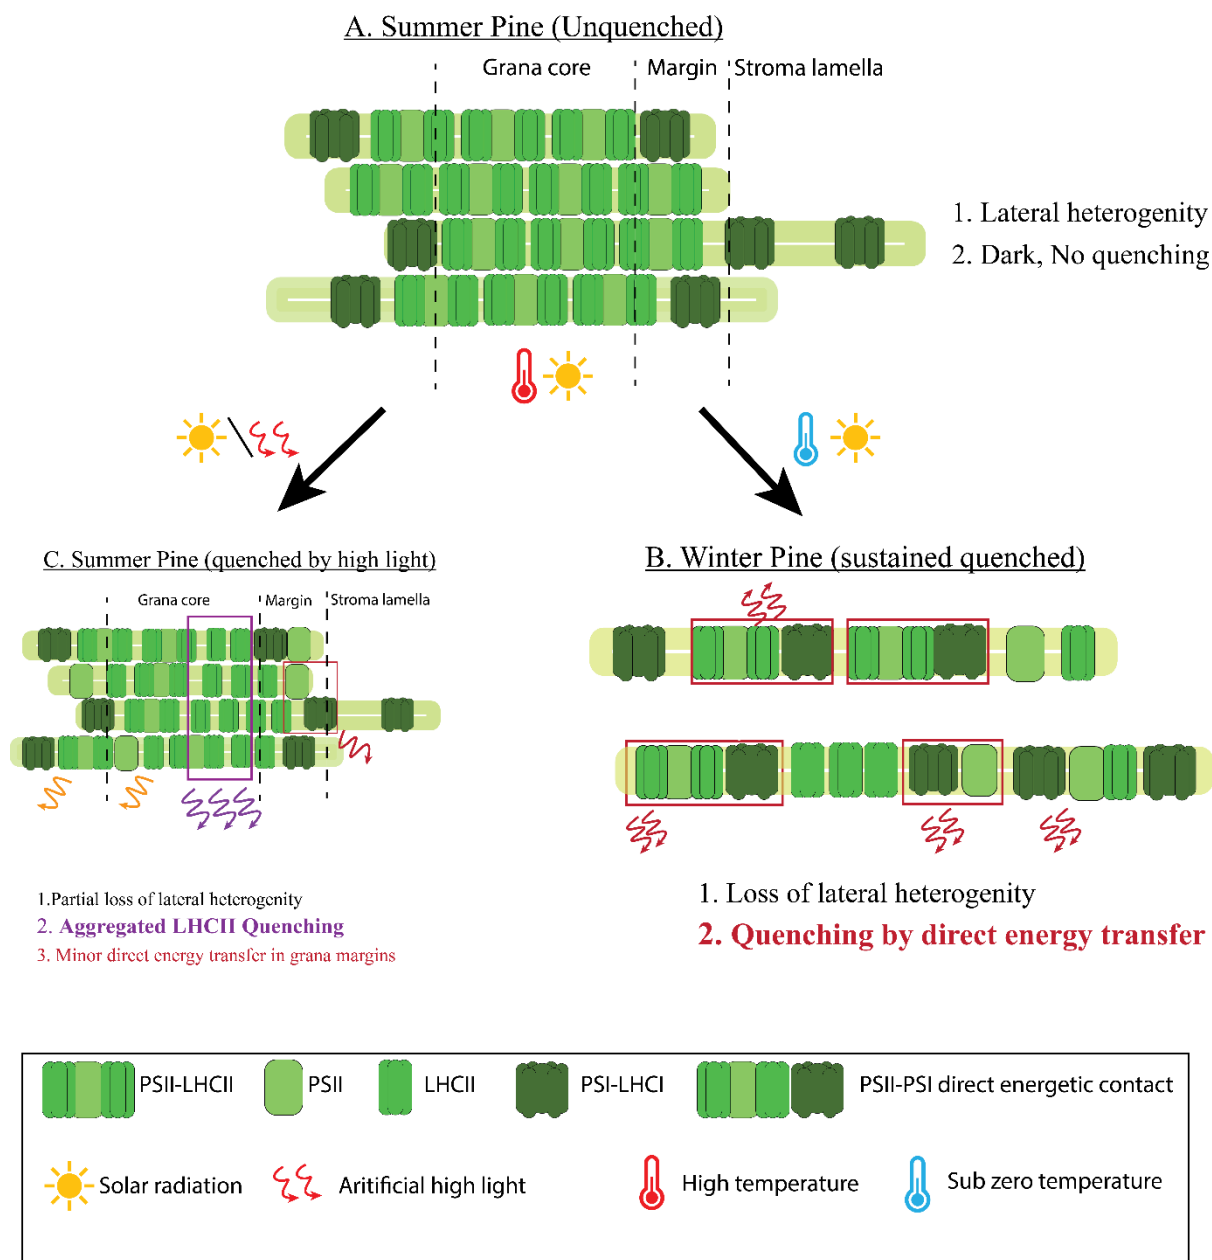

817

818 **Figure 6. Molecular model for acclimation of photosynthetic machinery under changing**  
 819 **natural environmental conditions**, such as, in Summer unquenched (A); Winter quenched  
 820 (B); Summer quenched (C) in Scots pine.  
 821

822

823

824

825

826 **Supplementary information.**

827 **Supplementary information 1. Sampling for seasonal profiling**

828 1A. Sampling dates for Fluorescence (2015-2016, 2016-2017 and 2017-2018) and P700  
 829 measurements (only 2016-2017 and 2017-2018)

830 **Season 2015-2016**

| Year | Month | Week |
|------|-------|------|
| 2015 | Sept  | 37   |
| 2015 | Oct   | 40   |
| 2015 | Oct   | 42   |
| 2015 | Nov   | 45   |
| 2015 | Nov   | 47   |
| 2015 | Dec   | 50   |
| 2015 | Dec   | 52   |
| 2016 | Jan   | 1    |
| 2016 | Jan   | 2    |
| 2016 | Feb   | 6    |
| 2016 | Feb   | 7    |
| 2016 | Mar   | 9    |
| 2016 | Mar   | 11   |
| 2016 | Apr   | 14   |
| 2016 | Apr   | 15   |
| 2016 | May   | 19   |
| 2016 | May   | 21   |

**Season 2016-2017**

| Year | Month | Week | Date     |
|------|-------|------|----------|
| 2016 | Nov   | 45   | 7.11.16  |
| 2016 | Nov   | 45   | 11.11.16 |
| 2016 | Nov   | 46   | 14.11.16 |
| 2016 | Nov   | 47   | 22.11.16 |
| 2016 | Nov   | 47   | 24.11.16 |
| 2016 | Nov   | 48   | 28.11.16 |
| 2016 | Dec   | 48   | 2.12.16  |
| 2016 | Dec   | 49   | 7.12.16  |
| 2016 | Dec   | 50   | 14.12.16 |
| 2017 | Jan   | 1    | 05.01.17 |
| 2017 | Jan   | 3    | 16.01.17 |
| 2017 | Jan   | 3    | 19.01.17 |
| 2017 | Jan   | 4    | 24.01.17 |
| 2017 | Feb   | 8    | 22.02.17 |
| 2017 | Feb   | 8    | 24.02.17 |
| 2017 | Mar   | 9    | 02.03.17 |
| 2017 | Mar   | 10   | 06.03.17 |
| 2017 | Mar   | 10   | 09.03.17 |
| 2017 | Mar   | 11   | 17.03.17 |
| 2017 | Mar   | 12   | 23.03.17 |
| 2017 | Mar   | 13   | 30.03.17 |
| 2017 | Apr   | 15   | 11.04.17 |
| 2017 | Apr   | 15   | 14.04.17 |
| 2017 | Apr   | 16   | 20.04.17 |
| 2017 | Apr   | 17   | 25.04.17 |
| 2017 | May   | 18   | 02.05.17 |
| 2017 | May   | 18   | 04.05.17 |
| 2017 | May   | 19   | 08.05.17 |
| 2017 | May   | 20   | 15.05.17 |
| 2017 | June  | 22   | 03.06.17 |

**Season 2017-2018**

| Year | Month | Week | Date     |
|------|-------|------|----------|
| 2017 | Oct   | 42   | 17.10.17 |
| 2017 | Dec   | 51   | 19.12.17 |
| 2018 | Mar   | 11   | 12.03.18 |
| 2018 | May   | 18   | 02.05.18 |
| 2018 | July  | 30   | 24.07.18 |

| Color Code |              |
|------------|--------------|
|            | Summer       |
|            | Winter       |
|            | Early Spring |
|            | Late Spring  |
|            | Summer       |

831

832

833

834

835 1B. Sampling for Time resolved measurements (2016-2017 and 2017-2018)

| Year | Month | Week | <sup>836</sup><br>Date |
|------|-------|------|------------------------|
| 2017 | Mar   | 9    | 02.03.17               |
| 2017 | Mar   | 10   | 06.03.17               |
| 2017 | Mar   | 10   | 09.03.17               |
| 2017 | May   | 20   | 15.05.17               |
| 2017 | June  | 22   | 03.06.17               |

|      |      |    |          |
|------|------|----|----------|
| 2018 | July | 30 | 24.07.18 |
|------|------|----|----------|

842

843 1C. Sampling for seasonal Electron Microscopy (2016-2017 and 2017-2018)

844

| Year | Month | Week | Date     |
|------|-------|------|----------|
| 2016 | Nov   | 45   | 11.11.16 |
| 2016 | Nov   | 46   | 14.11.16 |
| 2016 | Dec   | 48   | 2.12.16  |
| 2016 | Dec   | 50   | 14.12.16 |
| 2017 | Jan   | 1    | 05.01.17 |
| 2017 | Feb   | 8    | 24.02.17 |
| 2017 | Mar   | 9    | 02.03.17 |
| 2017 | Mar   | 10   | 06.03.17 |
| 2017 | Mar   | 10   | 09.03.17 |
| 2017 | Apr   | 15   | 14.04.17 |
| 2017 | Apr   | 16   | 20.04.17 |
| 2017 | Apr   | 17   | 25.04.17 |
| 2017 | May   | 18   | 02.05.17 |
| 2017 | May   | 20   | 15.05.17 |
| 2017 | June  | 22   | 03.06.17 |

| Year | Month | Week | <sup>845</sup><br>Date |
|------|-------|------|------------------------|
| 2017 | Oct   | 42   | 17.10.17               |
| 2017 | Dec   | 51   | 19.12.17               |
| 2018 | Mar   | 11   | 12.03.18               |
| 2018 | May   | 18   | 02.05.18               |
| 2018 | July  | 30   | 24.07.18               |

856

857 1D. Sampling for protein quantification (2016-2017 and 2017-2018)

| Year | Month | Week | <sup>858</sup><br>Date |
|------|-------|------|------------------------|
| 2017 | Mar   | 9    | 02.03.17               |
| 2017 | Mar   | 10   | 06.03.17               |
| 2017 | Mar   | 10   | 09.03.17               |
| 2017 | May   | 20   | 15.05.17               |
| 2017 | June  | 22   | 03.06.17               |

|      |      |    |          |
|------|------|----|----------|
| 2018 | July | 30 | 24.07.18 |
|------|------|----|----------|

864

## 865 Supplementary information 2. Seasonal performance of PSII

866

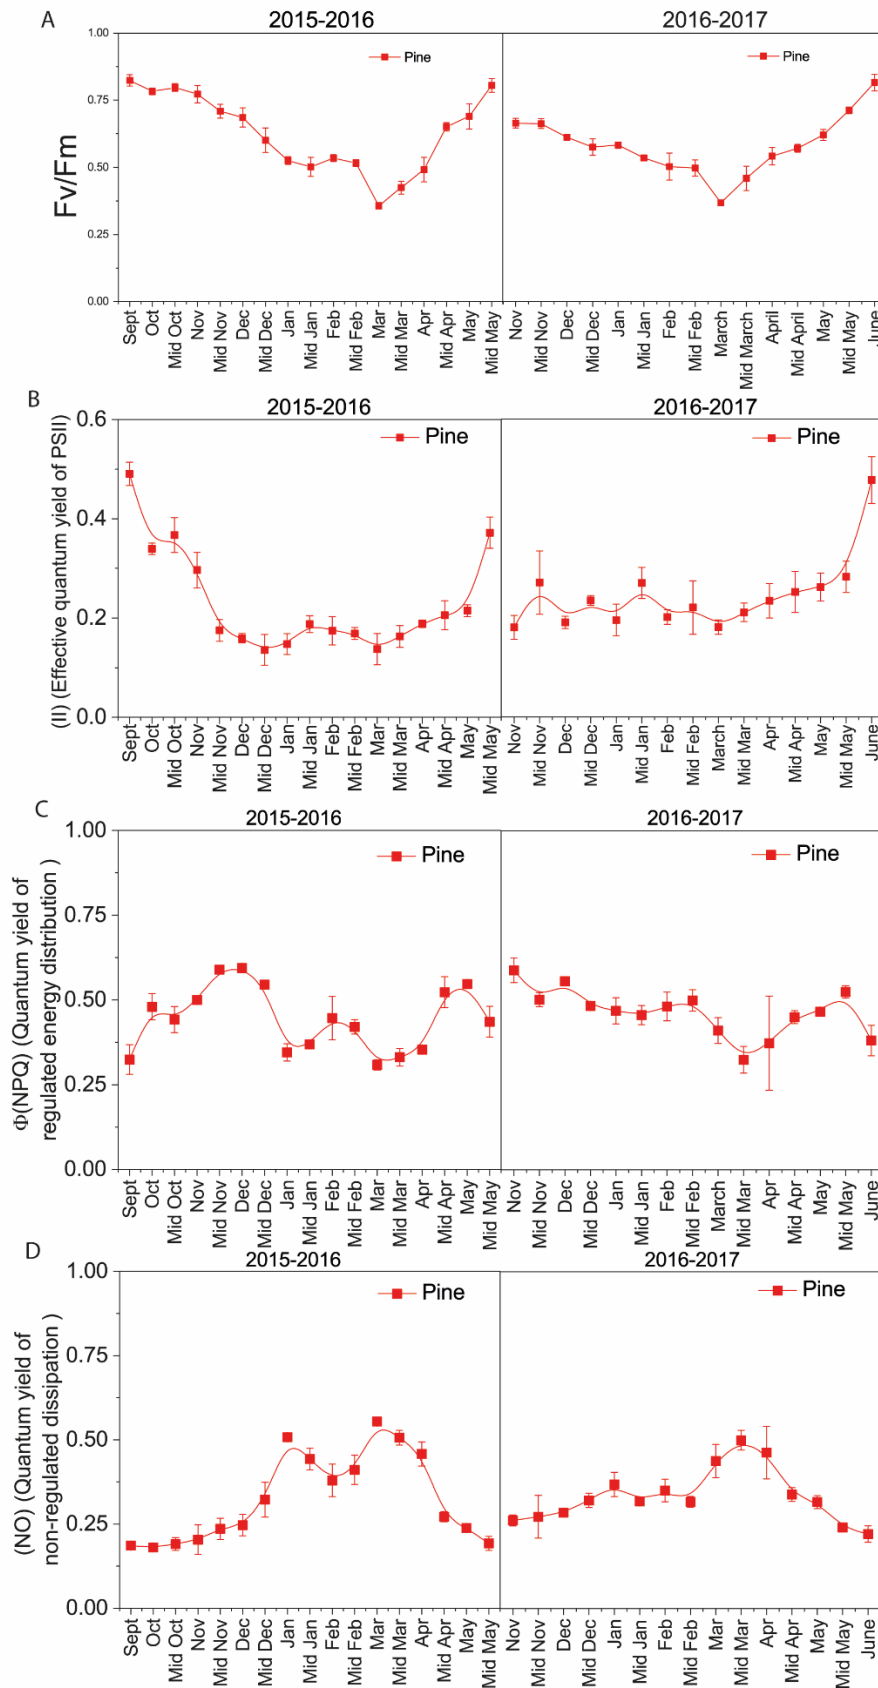

867

### 868 **Supplementary information 3. Seasonal performance of PSI**

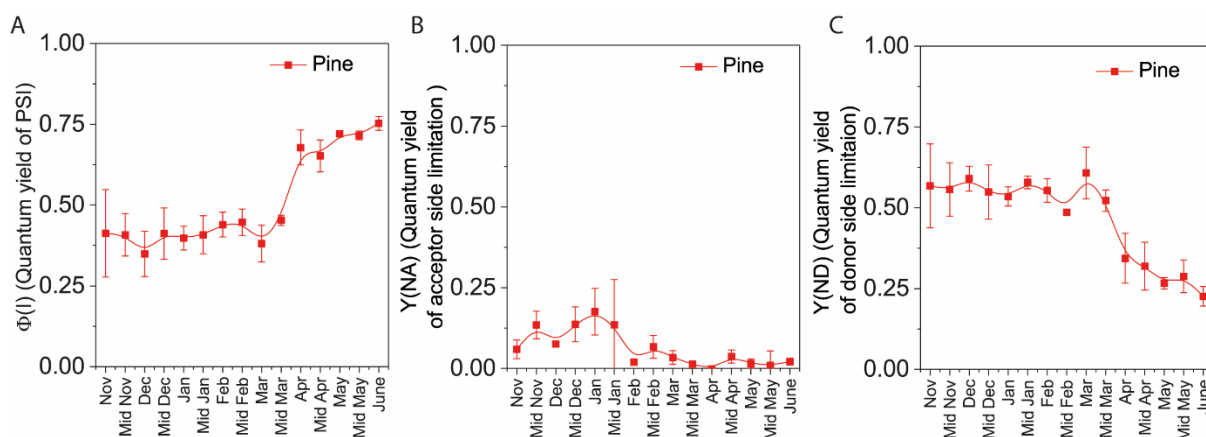

869

870

871

### 872 **Supplementary information 4. Lifetime measurements of pine needles**

873 4.1 Measuring cuvette with pine needles inside in S state (A) or ES (B). Temperature control  
874 chamber, with the cuvette inside it during the experiment.

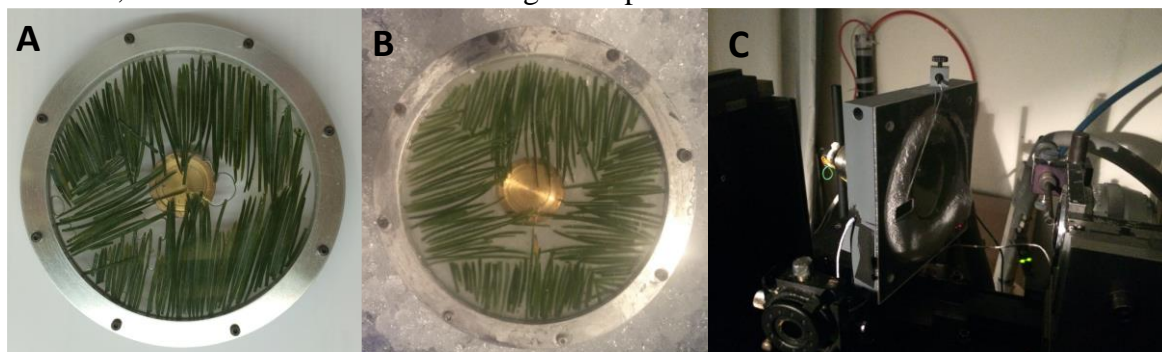

875

876

877

878

879

880

881

882

883

884

885

886



887 4.2 (A) and target (C) analysis of E.spring needles relaxed. (B) Reconstructed steady-state  
 888 PSI spectra in four measured states

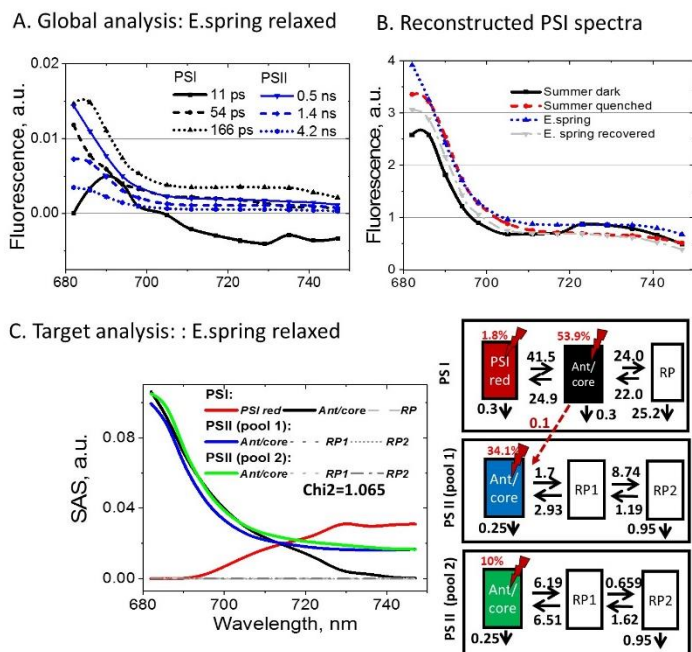

889

890

891 4.3. Targeted analysis of fluorescence kinetics of pine needles without spillover mechanism  
 892 present

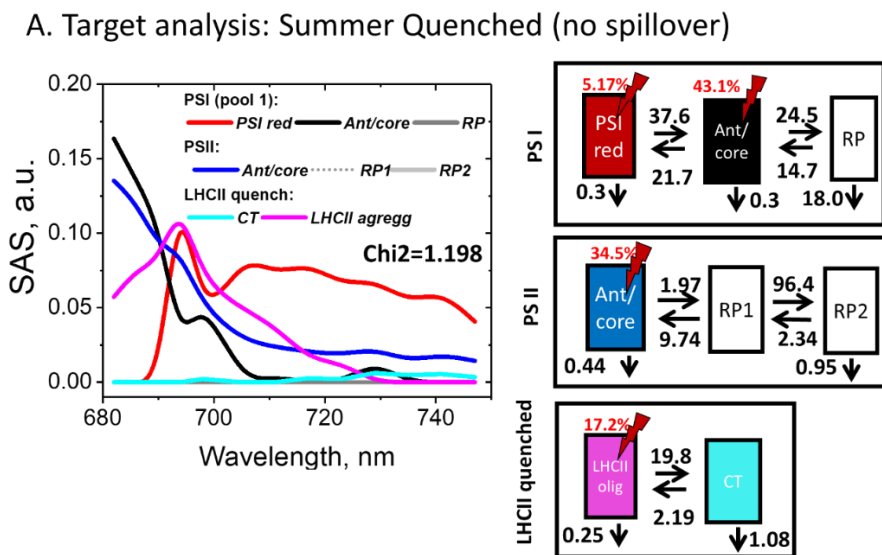

893

B. Target analysis: E.spring (no spillover)

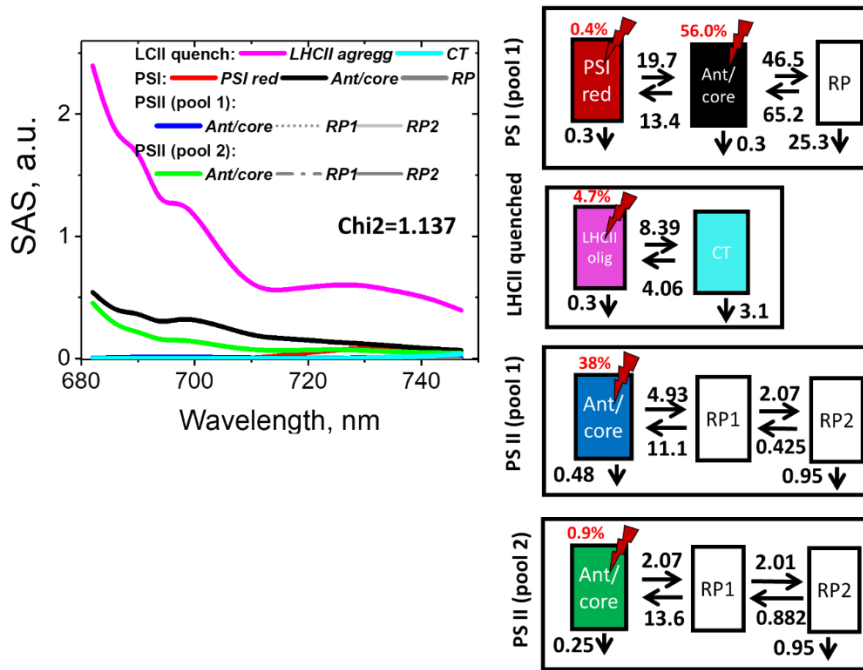

894  
895  
896  
897  
898  
899  
900  
901  
902  
903  
904  
905  
906  
907  
908  
909  
910  
911  
912

913 4.4. Auto co-relation and residuals plots

914 A. Example traces showing fitting of the data

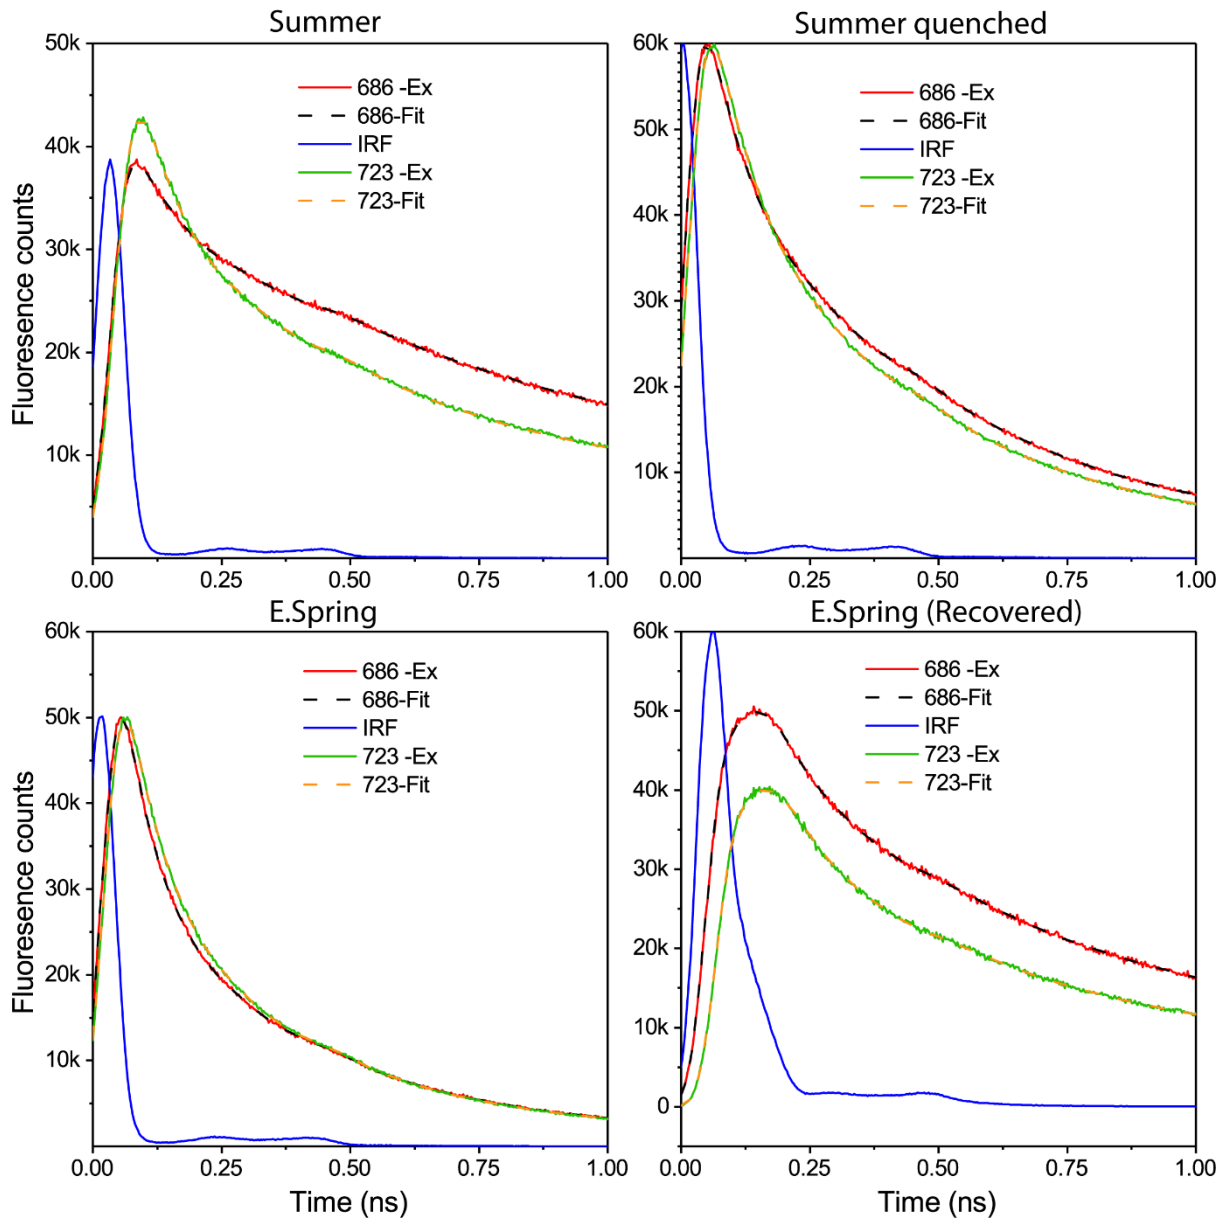

915

916

917

918

919

920

921

922

923

924 B. Auto correlation and residual plot (Summer and Summer quenched)

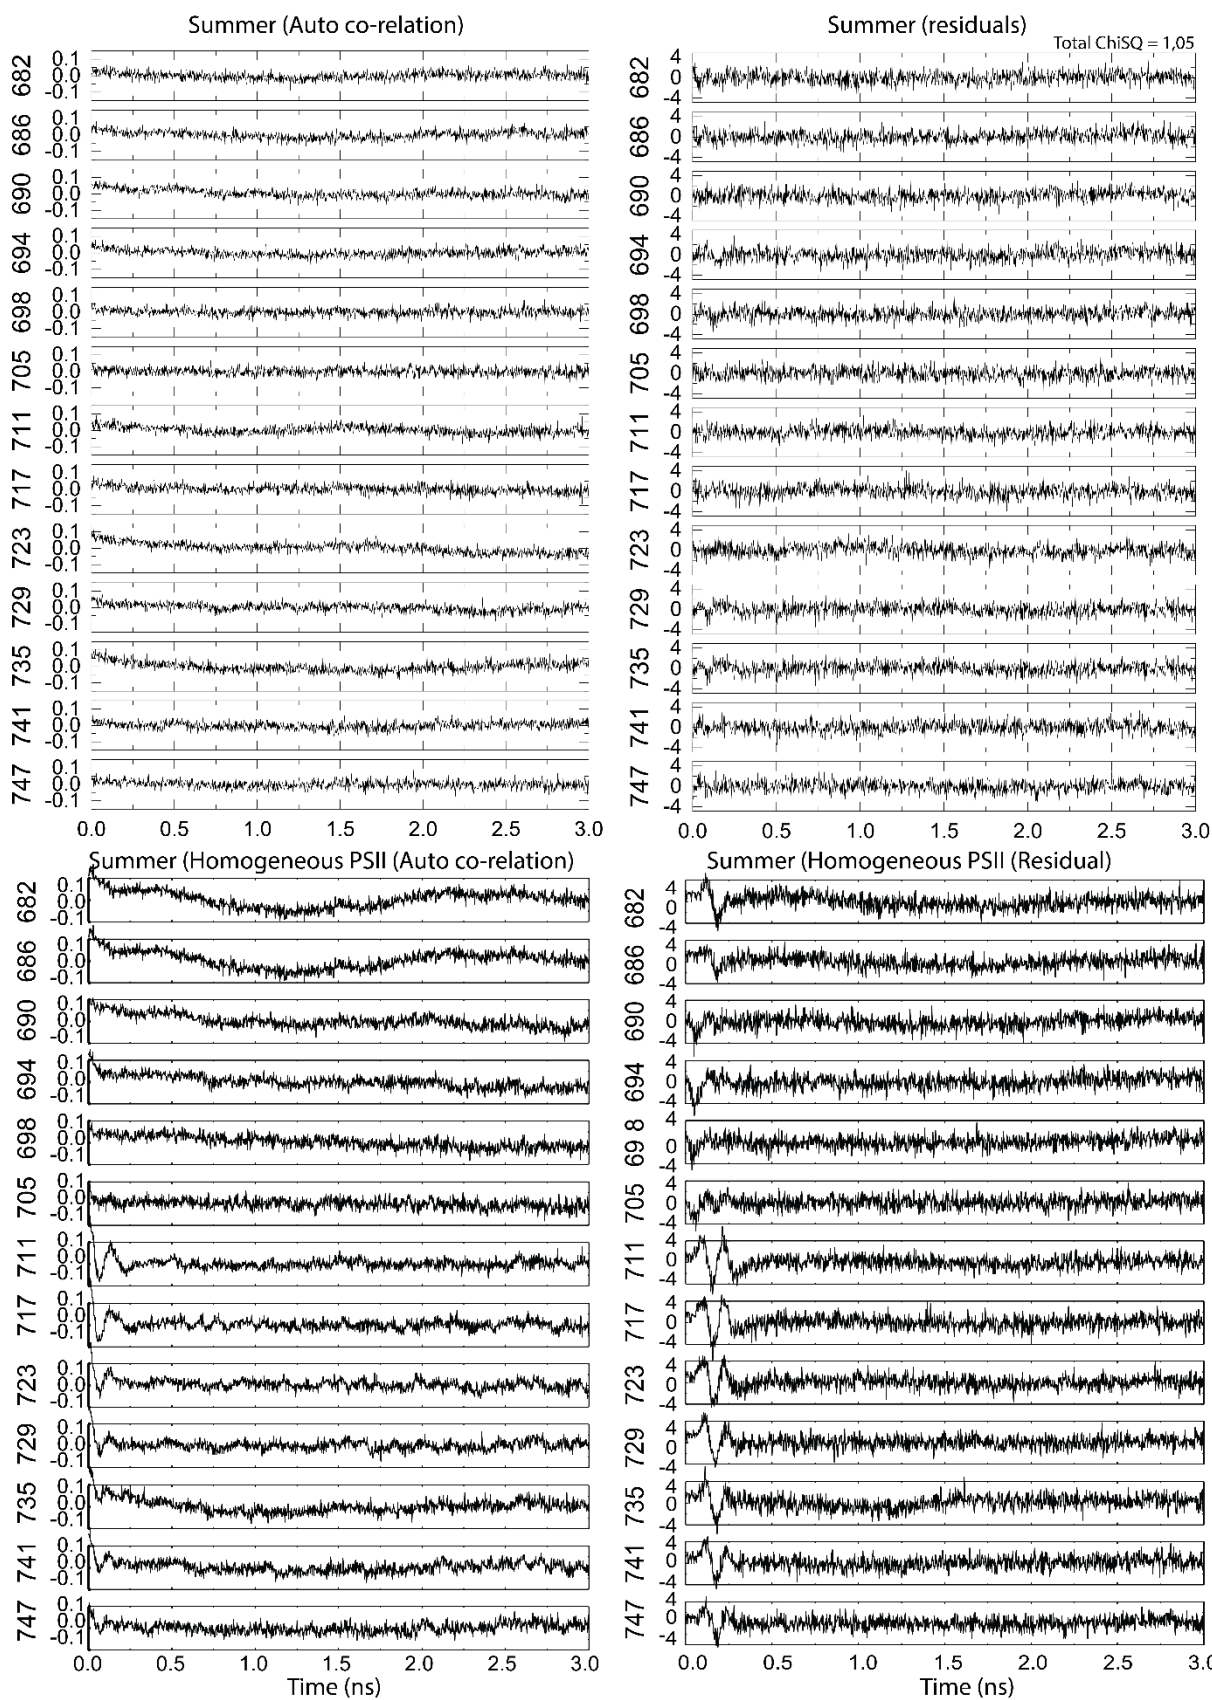

925

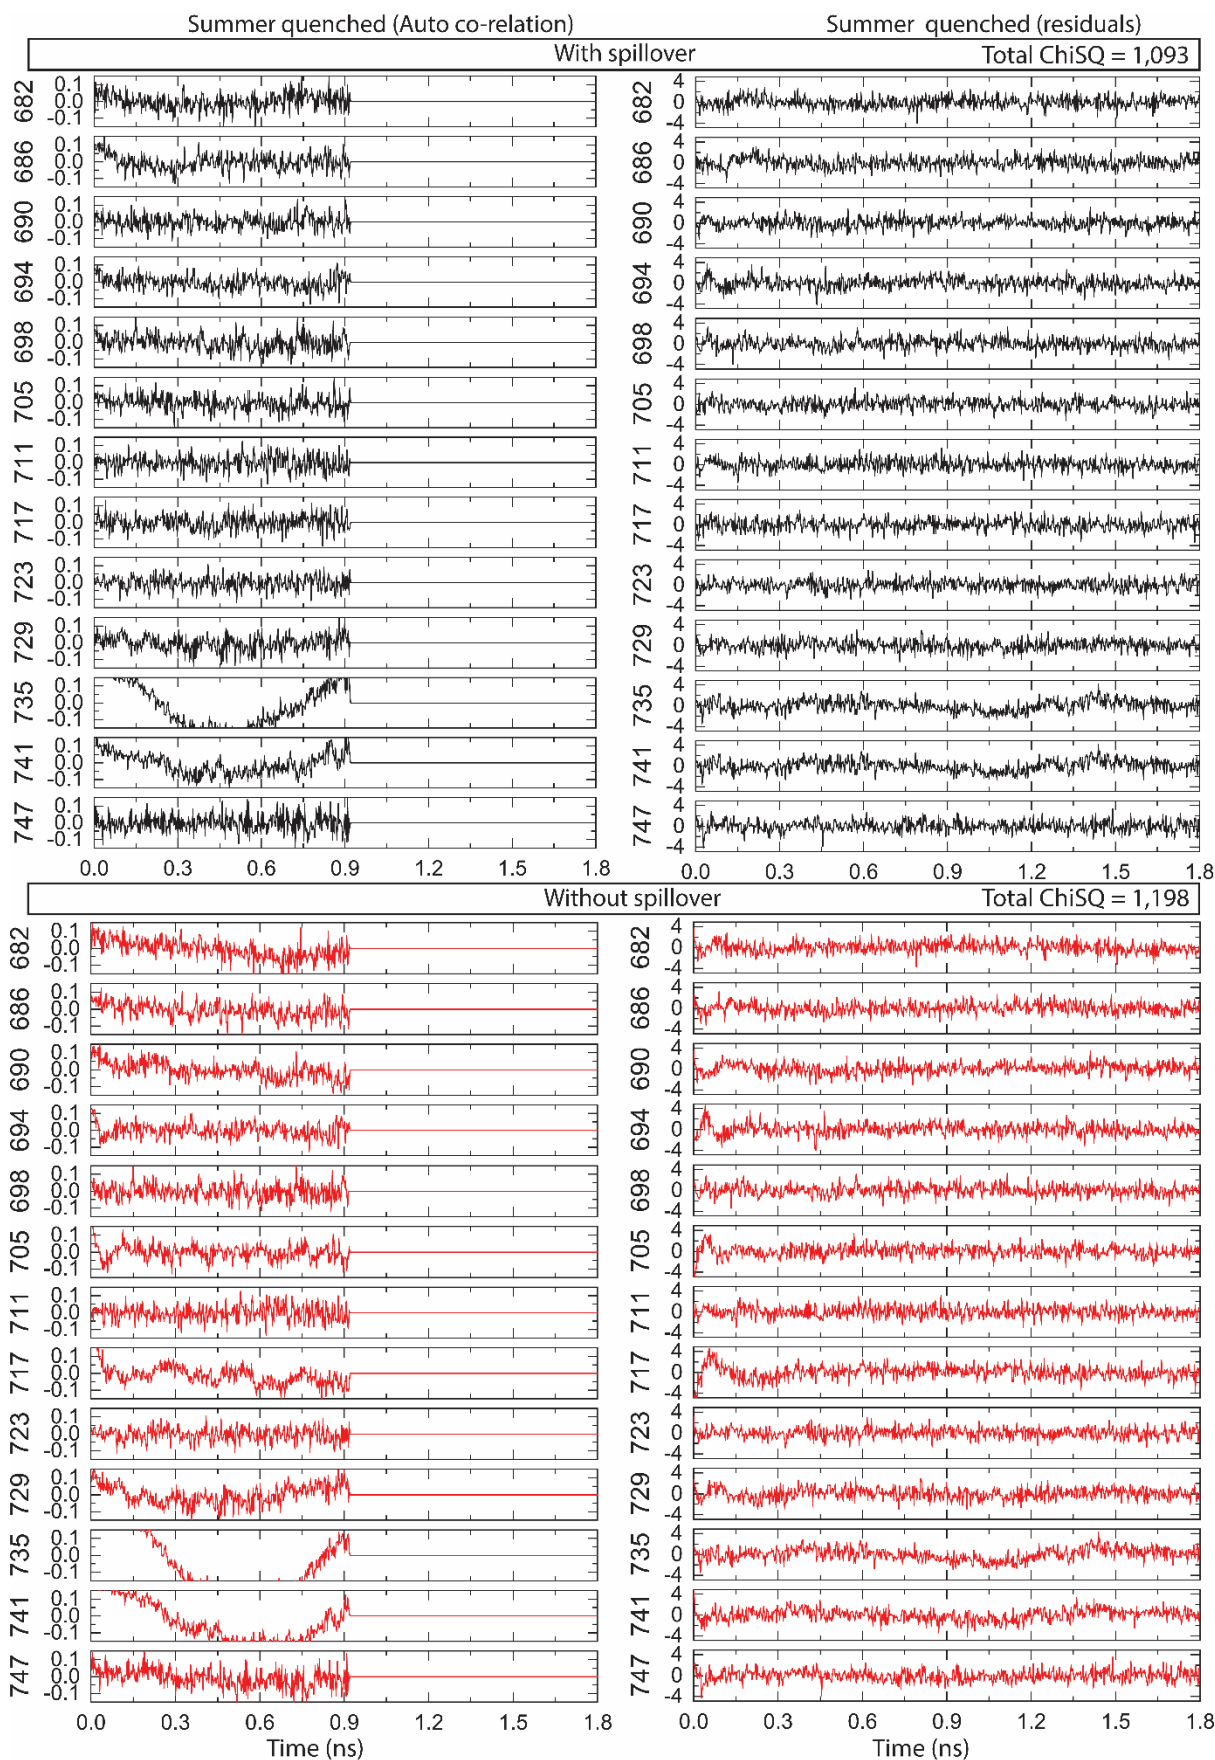

928 C. Auto correlation and residual plot (E.spring and E.spring recovered)

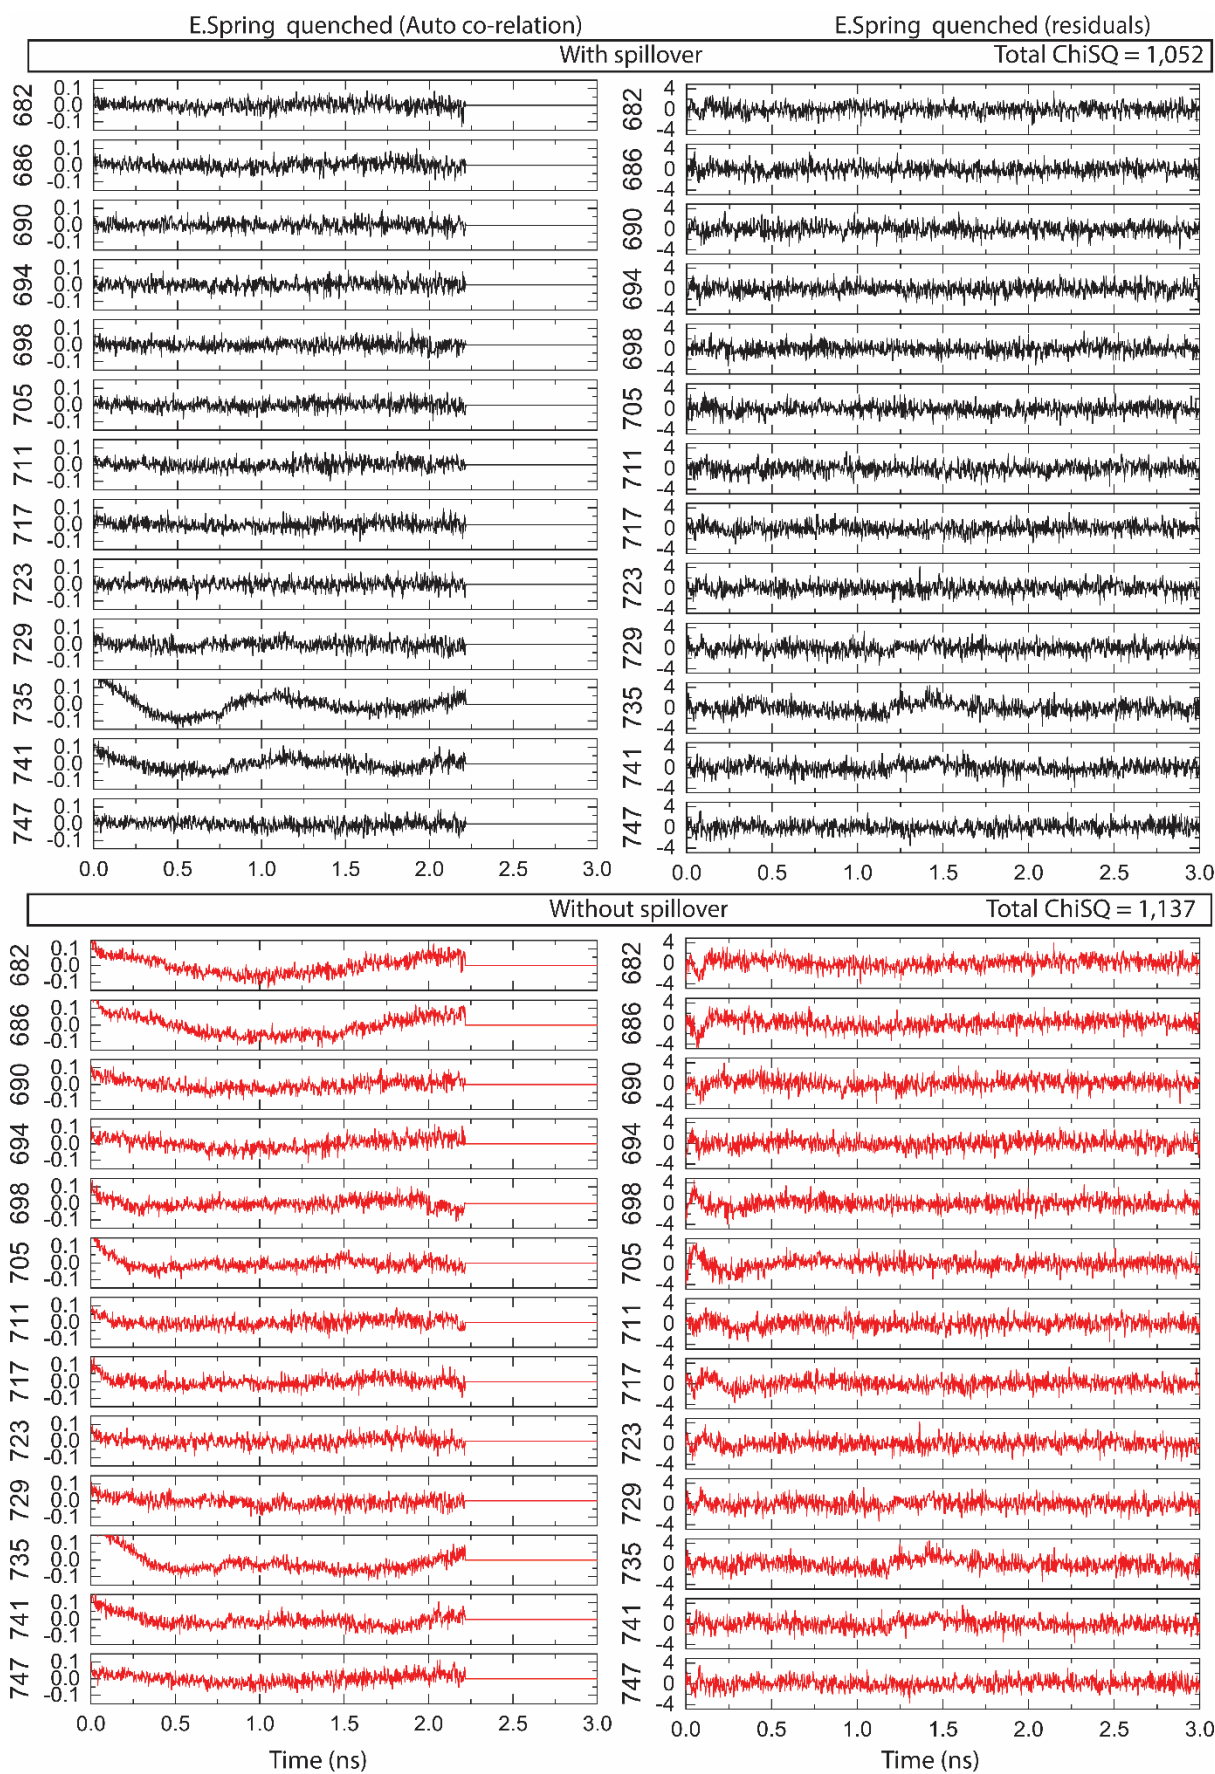

929



946 4.5. Time-dependent (on log time scale) populations of selected PSII and PSI compartments  
 947 as calculated from the fluorescence kinetics (Fig. 3C) . The dashed/dotted curves show the  
 948 kinetics energy (normalized to thr total ablsprtion cross-section) flowing into PSI (purple  
 949 dashed curves) and PSII (dotted black curves). The initial excitation input was taken from the  
 950 excitation vectors of corresponding target analysis results (Fig 3C). Depending on the state of  
 951 the respective reaction center, that energy will be either used for photochemistry or will be  
 952 deactivated non-radiatively (quenching). See Table 4 SI for the percentages. Black (PSI) and  
 953 green (PSII) curves show the time course of the excited state populations.

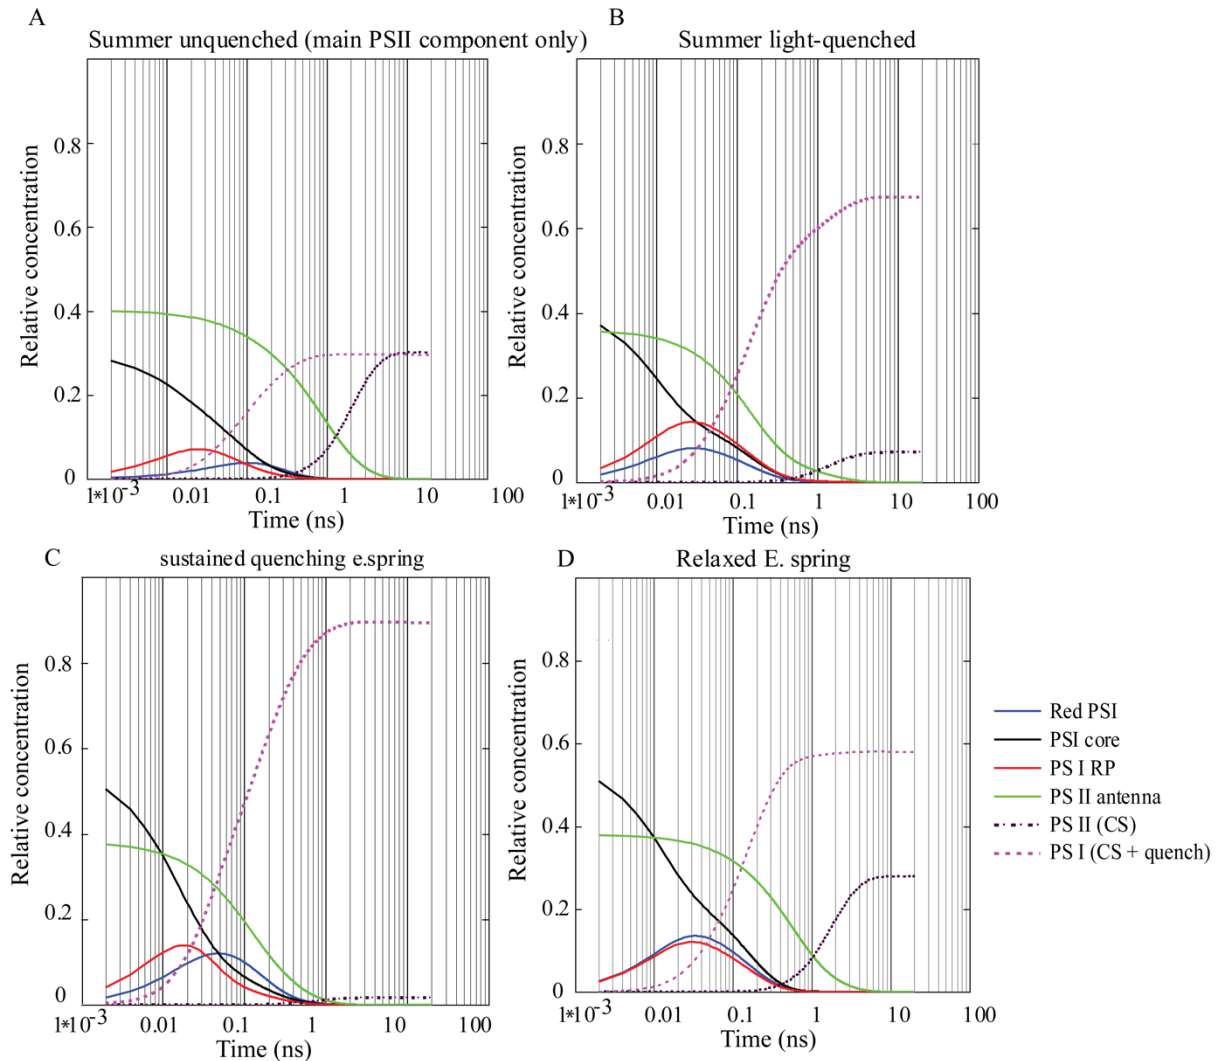

954

955

956

957

958

959

960

961



962 **Supplementary Information 5. I. SDS\_PAGE separation of thylakoid proteins loaded based**  
963 **on equal chlorophyll. II. Quantification protein by specific antibodies against PsbD, Lhcb2,**  
964 **PsaD and Lhca4.**

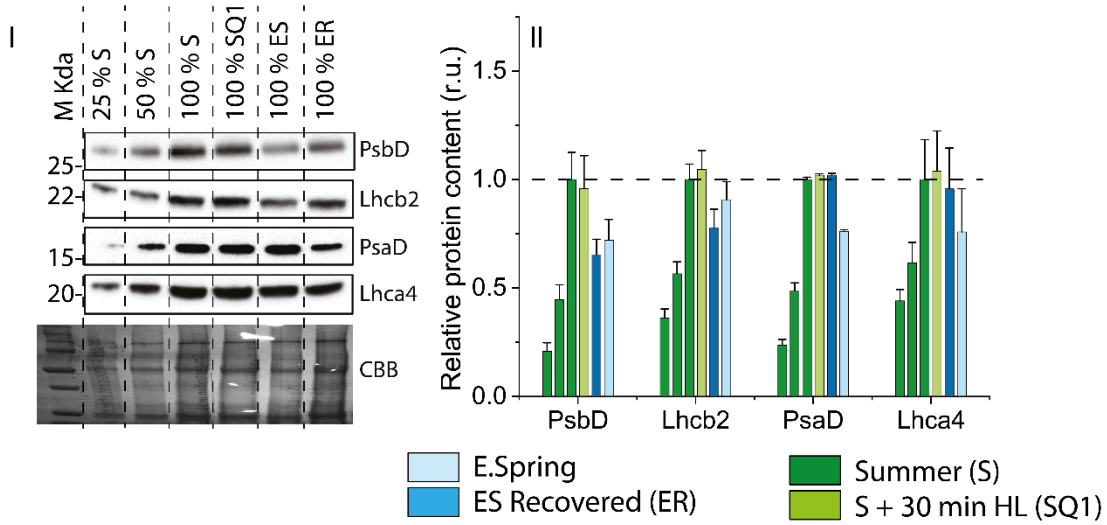

965  
966  
967  
968  
969  
970  
971  
972  
973  
974  
975  
976  
977  
978  
979  
980  
981  
982  
983  
984

985 **Supplementary Information 6.**

986 Table 1.

| Parameters                      | Autumn      | Winter       | E.Spring    | L.Spring      | Summer     |
|---------------------------------|-------------|--------------|-------------|---------------|------------|
| Number of Chloroplasts          | 15.2±3.93a  | 12.73±3.72c  | 13.46±4.05b | 14.2±4.26     | 16.3±2.38  |
| Number of grana per chloroplast | 23.07±6.90c | 18.66±9.24c  | 18.73±7.06c | 25.38±9.88    | 27.47±8.62 |
| Number of thylakoids per grana  | 4.97±0.27c  | 4.02±0.34c   | 2.72±0.46c  | 2.85±0.51c    | 6.50±0.33  |
| Lipid globules per Chloroplast  | 27.3±19.81c | 50.37±16.23c | 55.7±15.07c | 33.125±18.00c | 15.67±6.29 |

987

988 **Table 1. Quantitative analysis of seasonal changes in chloroplast ultrastructure as seen in**  
 989 **Transmission electron microscopy.** Statistical significance levels are referred as a, b, c  
 990 denoting 99.95%, 99.99% and 99.999% level of significance.

991

992

993

994

995 Table 2.

|                    | Summer    | Summer Quenched | E.spring (recovered) | E. spring |
|--------------------|-----------|-----------------|----------------------|-----------|
| Chl a/b            | 2.85±0.15 | 2.83±0.14       | 2.54±0.16            | 3.36±0.20 |
| Chl /Car           | 4.90±0.48 | 4.67±0.34       | 2.72±0.10            | 2.98±0.45 |
| Chl/fr w, mg/g     | 1.06±0.17 | 1.05±0.31       | 0.64±0.26            | 0.55±0.05 |
| Carotenoids/ Chl a |           |                 |                      |           |
| neo                | 0.23±0.02 | 0.23±0.02       | 0.52±0.08            | 0.37±0.28 |
| vio                | 0.26±0.03 | 0.29±0.06       | 0.77±0.22            | 0.15±0.03 |
| lut                | 0.83±0.21 | 0.96±0.27       | 2.61±0.14            | 2.15±0.43 |
| beta               | 0.27±0.09 | 0.37±0.12       | 0.16±0.003           | 0.48±0.09 |
| zea                | n.d.      | n.d             | n.d                  | 0.58±0.11 |

996

997 **Table 2. Pigment composition analysis by HPLC.** Chl, Chlorophyll; fr w, fresh weight; neo,  
 998 neoxanthin; vio violaxanthin; lut, lutein; beta, beta-carotene; zea, zeaxanthin. Shown is ±SD.  
 999 n=3

1000

1001

1002 Table 3

| <math>\langle \tau \rangle, \text{ps}</math> |        | Summer | Summer Quenched | E.spring (recovered) | E. spring |
|----------------------------------------------|--------|--------|-----------------|----------------------|-----------|
| PSI                                          |        | 95     | 95              | 90                   | 42        |
| PSII                                         | pool 1 | 988    | 357             | 820                  | 228       |
|                                              | pool 2 | 1228   |                 | 2113                 | 2950      |
|                                              | total  | 1086   |                 | 1137                 | 273       |
| LHCII quenched                               |        |        | 399             |                      | 420       |
| total                                        |        | 779    | 296             | 572                  | 170       |

1003

1004 **Table 3.** To assess differences in excited-state energy relaxation of different decaying components we  
 1005 calculated the average excited state relaxation time as  $\langle \tau \rangle = \sum A_i \tau_i$ , where  $A_i$  are the relative areas  
 1006 of each Decay-associated spectra (DAS). DAS were obtained from global target analysis (Fig. 3).

1007

1008

1009

1010 Table 4.

1011

| Sample condition  | PSI (CS and quenched) | PSII (CS) (Both pool taken together) | Comments                                                                               |
|-------------------|-----------------------|--------------------------------------|----------------------------------------------------------------------------------------|
| Summer unquenched | 50%                   | 30%                                  | figure shows only main pool contribution                                               |
| Summer quenched   | 67%                   | 7.1%                                 | detached and quenched LHCII not considered                                             |
| E.Spring relaxed  | 27%                   | 55%                                  | small amount of photoinhibited PSII pool not considered                                |
| E.Spring quenched | 89%                   | 1.5%                                 | small unquenched PSII pool and small quenched detached LHCII component not considered. |

1012

1013 **Table 4.** Percentages of total energy flow into PSII and PSI as calculated from Fig. 4.3 SI.

1014 For S state both PSII pools were taken into calculation

1015

1016
